# Supplementary material
Source: publisher site journal article supplement (https://www.dovepress.com/get_supplementary_file.php?f=197455b.xlsx)
Supplement: Supplementary file 1 [file get_supplementary_file.php]

## Sheet: HCC-SelectorDesign
Design phase	Genomic region
	Gene	Chr	Start (bp)	End (bp)	Length (bp)
known driver	TERT(Promotor）	chr5	1294720	1295219	500
known driver	AKT1	chr14	105236667	105236767	100
known driver	AKT1	chr14	105237071	105237194	123
known driver	AKT1	chr14	105238691	105238799	108
known driver	AKT1	chr14	105239204	105239439	235
known driver	AKT1	chr14	105239577	105239726	149
known driver	AKT1	chr14	105239781	105239927	146
known driver	AKT1	chr14	105240238	105240327	89
known driver	AKT1	chr14	105241264	105241350	86
known driver	AKT1	chr14	105241402	105241554	152
known driver	AKT1	chr14	105241978	105242146	168
known driver	AKT1	chr14	105242985	105243117	132
known driver	AKT1	chr14	105246414	105246563	149
known driver	AKT1	chr14	105258924	105258990	66
known driver	AKT1	chr14	105236667	105236767	100
known driver	BRAF	chr7	140508681	140508805	124
known driver	BRAF	chr7	140507749	140507872	123
known driver	BRAF	chr7	140508084	140508126	42
known driver	BRAF	chr7	140487337	140487394	57
known driver	BRAF	chr7	140534398	140534682	284
known driver	BRAF	chr7	140501201	140501370	169
known driver	BRAF	chr7	140482810	140482967	157
known driver	BRAF	chr7	140426283	140426326	43
known driver	BRAF	chr7	140434386	140434580	194
known driver	BRAF	chr7	140439601	140439756	155
known driver	BRAF	chr7	140447204	140447257	53
known driver	BRAF	chr7	140549900	140550022	122
known driver	BRAF	chr7	140624355	140624513	158
known driver	BRAF	chr7	140453976	140454043	67
known driver	BRAF	chr7	140500151	140500291	140
known driver	BRAF	chr7	140477780	140477885	105
known driver	BRAF	chr7	140481365	140481503	138
known driver	BRAF	chr7	140494097	140494277	180
known driver	BRAF	chr7	140476701	140476898	197
known driver	BRAF	chr7	140449076	140449228	152
known driver	BRAF	chr7	140453064	140453203	139
known driver	CDKN2A	chr9	21970890	21971217	327
known driver	CDKN2A	chr9	21968713	21968780	67
known driver	CDKN2A	chr9	21994127	21994463	336
known driver	CDKN2A	chr9	21968217	21968251	34
known driver	CDKN2A	chr9	21974465	21974836	371
known driver	CTNNB1	chr3	41275619	41275798	179
known driver	CTNNB1	chr3	41277829	41278000	171
known driver	CTNNB1	chr3	41275009	41275368	359
known driver	CTNNB1	chr3	41279496	41279577	81
known driver	CTNNB1	chr3	41280614	41280843	229
known driver	CTNNB1	chr3	41266006	41266254	248
known driver	CTNNB1	chr3	41278068	41278210	142
known driver	CTNNB1	chr3	41268688	41268853	165
known driver	CTNNB1	chr3	41274821	41274945	124
known driver	CTNNB1	chr3	41265549	41265582	33
known driver	CTNNB1	chr3	41277204	41277344	140
known driver	CTNNB1	chr3	41266814	41267073	259
known driver	CTNNB1	chr3	41267140	41267362	222
known driver	CTNNB1	chr3	41266434	41266708	274
known driver	EGFR	chr7	55238857	55238916	59
known driver	EGFR	chr7	55232962	55233140	178
known driver	EGFR	chr7	55224441	55224546	105
known driver	EGFR	chr7	55231415	55231526	111
known driver	EGFR	chr7	55223512	55223649	137
known driver	EGFR	chr7	55236205	55236232	27
known driver	EGFR	chr7	55248975	55249181	206
known driver	EGFR	chr7	55209968	55210140	172
known driver	EGFR	chr7	55224215	55224362	147
known driver	EGFR	chr7	55260448	55260544	96
known driver	EGFR	chr7	55086960	55087068	108
known driver	EGFR	chr7	55240665	55240827	162
known driver	EGFR	chr7	55210987	55211191	204
known driver	EGFR	chr7	55214288	55214443	155
known driver	EGFR	chr7	55240528	55240603	75
known driver	EGFR	chr7	55221693	55221855	162
known driver	EGFR	chr7	55227821	55228041	220
known driver	EGFR	chr7	55259401	55259577	176
known driver	EGFR	chr7	55268870	55269058	188
known driver	EGFR	chr7	55225345	55225456	111
known driver	EGFR	chr7	55269417	55269485	68
known driver	EGFR	chr7	55229181	55229334	153
known driver	EGFR	chr7	55218976	55219065	89
known driver	EGFR	chr7	55237989	55238247	258
known driver	EGFR	chr7	55220228	55220367	139
known driver	EGFR	chr7	55241603	55241746	143
known driver	EGFR	chr7	55267998	55268116	118
known driver	EGFR	chr7	55242404	55242523	119
known driver	EGFR	chr7	55220019	55220049	30
known driver	EGFR	chr7	55266399	55266566	167
known driver	EGFR	chr7	55270199	55270468	269
known driver	EGFR	chr7	55272938	55273320	382
known driver	ERBB2	chr17	37856481	37856574	93
known driver	ERBB2	chr17	37873562	37873747	185
known driver	ERBB2	chr17	37879780	37879923	143
known driver	ERBB2	chr17	37879561	37879720	159
known driver	ERBB2	chr17	37864563	37864797	234
known driver	ERBB2	chr17	37881949	37882116	167
known driver	ERBB2	chr17	37876029	37876097	68
known driver	ERBB2	chr17	37881291	37881467	176
known driver	ERBB2	chr17	37881569	37881665	96
known driver	ERBB2	chr17	37855802	37855850	48
known driver	ERBB2	chr17	37872757	37872868	111
known driver	ERBB2	chr17	37880968	37881174	206
known driver	ERBB2	chr17	37863232	37863404	172
known driver	ERBB2	chr17	37866328	37866464	136
known driver	ERBB2	chr17	37880154	37880273	119
known driver	ERBB2	chr17	37866582	37866744	162
known driver	ERBB2	chr17	37866055	37866144	89
known driver	ERBB2	chr17	37883057	37883266	209
known driver	ERBB2	chr17	37872543	37872696	153
known driver	ERBB2	chr17	37883931	37884307	376
known driver	ERBB2	chr17	37882804	37882922	118
known driver	ERBB2	chr17	37868170	37868310	140
known driver	ERBB2	chr17	37871688	37871799	111
known driver	ERBB2	chr17	37883537	37883810	273
known driver	ERBB2	chr17	37865560	37865715	155
known driver	ERBB2	chr17	37871528	37871622	94
known driver	ERBB2	chr17	37868564	37868711	147
known driver	ERBB2	chr17	37871982	37872202	220
known driver	HRAS	chr11	533285	533368	83
known driver	HRAS	chr11	532625	532765	140
known driver	HRAS	chr11	533442	533622	180
known driver	HRAS	chr11	534201	534332	131
known driver	HRAS	chr11	533755	533954	199
known driver	KEAP1	chr19	10599857	10600054	197
known driver	KEAP1	chr19	10610060	10610719	659
known driver	KEAP1	chr19	10602242	10602948	706
known driver	KEAP1	chr19	10597317	10597504	187
known driver	KEAP1	chr19	10600313	10600539	226
known driver	KRAS	chr12	25380157	25380356	199
known driver	KRAS	chr12	25378537	25378717	180
known driver	KRAS	chr12	25362718	25362855	137
known driver	KRAS	chr12	25398197	25398328	131
known driver	KRAS	chr12	25368364	25368504	140
known driver	MAP2K1	chr15	66736983	66737055	72
known driver	MAP2K1	chr15	66774082	66774227	145
known driver	MAP2K1	chr15	66779555	66779640	85
known driver	MAP2K1	chr15	66782045	66782111	66
known driver	MAP2K1	chr15	66781542	66781624	82
known driver	MAP2K1	chr15	66782829	66782963	134
known driver	MAP2K1	chr15	66735607	66735705	98
known driver	MAP2K1	chr15	66729073	66729240	167
known driver	MAP2K1	chr15	66727354	66727585	231
known driver	MAP2K1	chr15	66777317	66777539	222
known driver	MAP2K1	chr15	66679675	66679775	100
known driver	MET	chr7	116395398	116395579	181
known driver	MET	chr7	116403093	116403332	239
known driver	MET	chr7	116435930	116436188	258
known driver	MET	chr7	116411541	116411718	177
known driver	MET	chr7	116371711	116371923	212
known driver	MET	chr7	116414924	116415175	251
known driver	MET	chr7	116335800	116335863	63
known driver	MET	chr7	116380895	116381089	194
known driver	MET	chr7	116339114	116340348	1234
known driver	MET	chr7	116379993	116380148	155
known driver	MET	chr7	116411892	116412053	161
known driver	MET	chr7	116409688	116409930	242
known driver	MET	chr7	116397681	116397838	157
known driver	MET	chr7	116418819	116419021	202
known driver	MET	chr7	116422031	116422161	130
known driver	MET	chr7	116399380	116399554	174
known driver	MET	chr7	116435698	116435855	157
known driver	MET	chr7	116417432	116417533	101
known driver	MET	chr7	116398502	116398684	182
known driver	MET	chr7	116397480	116397603	123
known driver	MET	chr7	116423347	116423533	186
known driver	NFE2L2	chr2	178129249	178129314	65
known driver	NFE2L2	chr2	178095502	178096746	1244
known driver	NFE2L2	chr2	178097109	178097321	212
known driver	NFE2L2	chr2	178098722	178099009	287
known driver	NFE2L2	chr2	178097895	178098077	182
known driver	NFE2L2	chr2	178092623	178092691	68
known driver	NOTCH1	chr9	139413884	139414027	143
known driver	NOTCH1	chr9	139413032	139413286	254
known driver	NOTCH1	chr9	139418158	139418441	283
known driver	NOTCH1	chr9	139412578	139412754	176
known driver	NOTCH1	chr9	139438465	139438564	99
known driver	NOTCH1	chr9	139396189	139396375	186
known driver	NOTCH1	chr9	139412193	139412399	206
known driver	NOTCH1	chr9	139417291	139417650	359
known driver	NOTCH1	chr9	139402396	139402601	205
known driver	NOTCH1	chr9	139399751	139400343	592
known driver	NOTCH1	chr9	139411713	139411847	134
known driver	NOTCH1	chr9	139393340	139393458	118
known driver	NOTCH1	chr9	139394993	139395309	316
known driver	NOTCH1	chr9	139410422	139410556	134
known driver	NOTCH1	chr9	139403311	139403533	222
known driver	NOTCH1	chr9	139396442	139396550	108
known driver	NOTCH1	chr9	139393553	139393721	168
known driver	NOTCH1	chr9	139397623	139397792	169
known driver	NOTCH1	chr9	139440167	139440248	81
known driver	NOTCH1	chr9	139409731	139409862	131
known driver	NOTCH1	chr9	139400968	139401101	133
known driver	NOTCH1	chr9	139390512	139392020	1508
known driver	NOTCH1	chr9	139409924	139410178	254
known driver	NOTCH1	chr9	139402673	139402847	174
known driver	NOTCH1	chr9	139408951	139409164	213
known driver	NOTCH1	chr9	139396713	139396950	237
known driver	NOTCH1	chr9	139404174	139404423	249
known driver	NOTCH1	chr9	139399114	139399566	452
known driver	NOTCH1	chr9	139405094	139405267	173
known driver	NOTCH1	chr9	139407462	139407596	134
known driver	NOTCH1	chr9	139407833	139407999	166
known driver	NOTCH1	chr9	139401157	139401435	278
known driver	NOTCH1	chr9	139405593	139405733	140
known driver	NOTCH1	chr9	139401746	139401899	153
known driver	NRAS	chr1	115258660	115258791	131
known driver	NRAS	chr1	115256410	115256609	199
known driver	NRAS	chr1	115252179	115252359	180
known driver	NRAS	chr1	115251145	115251285	140
known driver	PIK3CA	chr3	178947781	178947919	138
known driver	PIK3CA	chr3	178951871	178952162	291
known driver	PIK3CA	chr3	178927372	178927498	126
known driver	PIK3CA	chr3	178948002	178948174	172
known driver	PIK3CA	chr3	178917467	178917697	230
known driver	PIK3CA	chr3	178927963	178928136	173
known driver	PIK3CA	chr3	178921321	178921587	266
known driver	PIK3CA	chr3	178943739	178943838	99
known driver	PIK3CA	chr3	178942477	178942619	142
known driver	PIK3CA	chr3	178947049	178947240	191
known driver	PIK3CA	chr3	178941858	178941985	127
known driver	PIK3CA	chr3	178916603	178916977	374
known driver	PIK3CA	chr3	178928208	178928363	155
known driver	PIK3CA	chr3	178935987	178936132	145
known driver	PIK3CA	chr3	178936973	178937075	102
known driver	PIK3CA	chr3	178919067	178919338	271
known driver	PIK3CA	chr3	178922280	178922386	106
known driver	PIK3CA	chr3	178937726	178937850	124
known driver	PIK3CA	chr3	178938763	178938955	192
known driver	PIK3CA	chr3	178937348	178937533	185
known driver	PTEN	chr10	89711864	89712026	162
known driver	PTEN	chr10	89692759	89693018	259
known driver	PTEN	chr10	89717599	89717786	187
known driver	PTEN	chr10	89725033	89725239	206
known driver	PTEN	chr10	89720640	89720885	245
known driver	PTEN	chr10	89685259	89685324	65
known driver	PTEN	chr10	89690792	89690856	64
known driver	PTEN	chr10	89624216	89624315	99
known driver	PTEN	chr10	89653771	89653876	105
known driver	STK11	chr19	1226442	1226656	214
known driver	STK11	chr19	1206902	1207212	310
known driver	STK11	chr19	1222973	1223181	208
known driver	STK11	chr19	1220361	1220514	153
known driver	STK11	chr19	1221937	1222015	78
known driver	STK11	chr19	1219312	1219422	110
known driver	STK11	chr19	1218405	1218509	104
known driver	STK11	chr19	1221201	1221349	148
known driver	STK11	chr19	1220569	1220726	157
known driver	TP53	chr17	7572916	7573018	102
known driver	TP53	chr17	7579828	7579922	94
known driver	TP53	chr17	7579689	7579731	42
known driver	TP53	chr17	7576526	7576594	68
known driver	TP53	chr17	7573916	7574043	127
known driver	TP53	chr17	7579301	7579600	299
known driver	TP53	chr17	7577008	7577165	157
known driver	TP53	chr17	7578127	7578299	172
known driver	TP53	chr17	7569513	7569572	59
known driver	TP53	chr17	7565246	7565342	96
known driver	TP53	chr17	7578360	7578564	204
known driver	TP53	chr17	7576842	7576936	94
known driver	TP53	chr17	7577488	7577618	130
known driver	TP53	chr17	7576614	7576667	53
known driver	RPS6KA3	chrX	20227395	20227532	137
known driver	RPS6KA3	chrX	20236907	20236966	59
known driver	RPS6KA3	chrX	20181071	20181168	97
known driver	RPS6KA3	chrX	20185696	20185875	179
known driver	RPS6KA3	chrX	20183006	20183188	182
known driver	RPS6KA3	chrX	20284671	20284760	89
known driver	RPS6KA3	chrX	20252865	20252942	77
known driver	RPS6KA3	chrX	20222129	20222231	102
known driver	RPS6KA3	chrX	20190853	20190999	146
known driver	RPS6KA3	chrX	20193271	20193416	145
known driver	RPS6KA3	chrX	20187509	20187619	110
known driver	RPS6KA3	chrX	20174216	20174377	161
known driver	RPS6KA3	chrX	20204403	20204494	91
known driver	RPS6KA3	chrX	20211594	20211721	127
known driver	RPS6KA3	chrX	20179751	20179889	138
known driver	RPS6KA3	chrX	20213172	20213273	101
known driver	RPS6KA3	chrX	20212296	20212396	100
known driver	RPS6KA3	chrX	20206604	20206662	58
known driver	RPS6KA3	chrX	20194357	20194480	123
known driver	RPS6KA3	chrX	20194541	20194626	85
known driver	RPS6KA3	chrX	20205935	20206098	163
known driver	RPS6KA3	chrX	20195103	20195212	109
known driver	RPS6KA3	chrX	20173505	20173648	143
known driver	APC	chr5	112136965	112137090	125
known driver	APC	chr5	112116476	112116615	139
known driver	APC	chr5	112157582	112157698	116
known driver	APC	chr5	112173239	112179833	6594
known driver	APC	chr5	112151181	112151300	119
known driver	APC	chr5	112162794	112162954	160
known driver	APC	chr5	112111315	112111444	129
known driver	APC	chr5	112145812	112145862	50
known driver	APC	chr5	112164542	112164679	137
known driver	APC	chr5	112128132	112128236	104
known driver	APC	chr5	112102012	112102117	105
known driver	APC	chr5	112163615	112163713	98
known driver	APC	chr5	112170637	112170872	235
known driver	APC	chr5	112192335	112192380	45
known driver	APC	chr5	112090577	112090732	155
known driver	APC	chr5	112102875	112103097	222
known driver	APC	chr5	112198194	112198243	49
known driver	APC	chr5	112043404	112043589	185
known driver	APC	chr5	112154652	112155051	399
known driver	ATM	chr11	108150207	108150345	138
known driver	ATM	chr11	108098492	108098625	133
known driver	ATM	chr11	108126931	108127077	146
known driver	ATM	chr11	108114669	108114855	186
known driver	ATM	chr11	108106386	108106571	185
known driver	ATM	chr11	108099894	108100060	166
known driver	ATM	chr11	108128197	108128343	146
known driver	ATM	chr11	108235798	108235955	157
known driver	ATM	chr11	108151711	108151905	194
known driver	ATM	chr11	108143438	108143589	151
known driver	ATM	chr11	108213938	108214108	170
known driver	ATM	chr11	108124530	108124776	246
known driver	ATM	chr11	108172364	108172526	162
known driver	ATM	chr11	108165643	108165796	153
known driver	ATM	chr11	108143248	108143344	96
known driver	ATM	chr11	108123533	108123649	116
known driver	ATM	chr11	108217995	108218102	107
known driver	ATM	chr11	108170430	108170622	192
known driver	ATM	chr11	108188089	108188258	169
known driver	ATM	chr11	108186727	108186850	123
known driver	ATM	chr11	108122553	108122768	215
known driver	ATM	chr11	108206561	108206698	137
known driver	ATM	chr11	108098341	108098433	92
known driver	ATM	chr11	108141967	108142143	176
known driver	ATM	chr11	108183127	108183235	108
known driver	ATM	chr11	108175391	108175589	198
known driver	ATM	chr11	108164029	108164214	185
known driver	ATM	chr11	108196774	108196962	188
known driver	ATM	chr11	108129702	108129812	110
known driver	ATM	chr11	108216459	108216645	186
known driver	ATM	chr11	108205685	108205846	161
known driver	ATM	chr11	108186539	108186648	109
known driver	ATM	chr11	108180876	108181052	176
known driver	ATM	chr11	108115504	108115763	259
known driver	ATM	chr11	108121417	108121809	392
known driver	ATM	chr11	108203478	108203637	159
known driver	ATM	chr11	108202160	108202294	134
known driver	ATM	chr11	108178613	108178721	108
known driver	ATM	chr11	108168003	108168119	116
known driver	ATM	chr11	108117680	108117864	184
known driver	ATM	chr11	108236041	108236245	204
known driver	ATM	chr11	108153426	108153616	190
known driver	ATM	chr11	108204602	108204705	103
known driver	ATM	chr11	108141780	108141883	103
known driver	ATM	chr11	108119649	108119839	190
known driver	ATM	chr11	108196026	108196281	255
known driver	ATM	chr11	108198361	108198495	134
known driver	ATM	chr11	108154943	108155210	267
known driver	ATM	chr11	108158316	108158452	136
known driver	ATM	chr11	108163335	108163530	195
known driver	ATM	chr11	108173569	108173766	197
known driver	ATM	chr11	108139126	108139346	220
known driver	ATM	chr11	108200930	108201158	228
known driver	ATM	chr11	108192017	108192157	140
known driver	ATM	chr11	108224482	108224617	135
known driver	ATM	chr11	108160318	108160538	220
known driver	ATM	chr11	108225527	108225611	84
known driver	ATM	chr11	108199737	108199975	238
known driver	ATM	chr11	108190670	108190795	125
known driver	ATM	chr11	108202595	108202774	179
known driver	ATM	chr11	108159693	108159840	147
known driver	ATM	chr11	108137887	108138079	192
known driver	MLL	chr11	118359318	118359485	167
known driver	MLL	chr11	118373102	118377371	4269
known driver	MLL	chr11	118371691	118371872	181
known driver	MLL	chr11	118378233	118378334	101
known driver	MLL	chr11	118391992	118392142	150
known driver	MLL	chr11	118372376	118372582	206
known driver	MLL	chr11	118359198	118359224	26
known driver	MLL	chr11	118348671	118348926	255
known driver	MLL	chr11	118342366	118345040	2674
known driver	MLL	chr11	118391506	118391610	104
known driver	MLL	chr11	118364992	118365123	131
known driver	MLL	chr11	118360496	118360612	116
known driver	MLL	chr11	118390661	118390789	128
known driver	MLL	chr11	118339450	118339569	119
known driver	MLL	chr11	118370539	118370638	99
known driver	MLL	chr11	118379840	118379925	85
known driver	MLL	chr11	118352419	118352817	398
known driver	MLL	chr11	118380652	118380843	191
known driver	MLL	chr11	118382655	118382750	95
known driver	MLL	chr11	118370007	118370145	138
known driver	MLL	chr11	118355566	118355700	134
known driver	MLL	chr11	118350878	118350963	85
known driver	MLL	chr11	118309728	118309847	119
known driver	MLL	chr11	118360833	118360974	141
known driver	MLL	chr11	118369074	118369253	179
known driver	MLL	chr11	118361900	118362043	143
known driver	MLL	chr11	118353126	118353220	94
known driver	MLL	chr11	118368640	118368798	158
known driver	MLL	chr11	118390322	118390517	195
known driver	MLL	chr11	118354887	118355072	185
known driver	MLL	chr11	118307217	118307669	452
known driver	MLL	chr11	118392601	118392897	296
known driver	MLL	chr11	118366404	118366618	214
known driver	MLL	chr11	118363761	118363955	194
known driver	MLL	chr11	118362448	118362653	205
known driver	MLL	chr11	118347509	118347707	198
known driver	MLL	chr11	118366965	118367092	127
known driver	MLL	chr11	118365398	118365492	94
known driver	MLL3	chr7	151845107	151846247	1140
known driver	MLL3	chr7	151851084	151851241	157
known driver	MLL3	chr7	151847974	151848102	128
known driver	MLL3	chr7	151849779	151850049	270
known driver	MLL3	chr7	151851341	151851540	199
known driver	MLL3	chr7	152008872	152009041	169
known driver	MLL3	chr7	152007040	152007170	130
known driver	MLL3	chr7	151921089	151921274	185
known driver	MLL3	chr7	151902180	151902320	140
known driver	MLL3	chr7	151880048	151880251	203
known driver	MLL3	chr7	151960090	151960225	135
known driver	MLL3	chr7	151877785	151879689	1904
known driver	MLL3	chr7	151919647	151919777	130
known driver	MLL3	chr7	151836749	151836886	137
known driver	MLL3	chr7	151882632	151882726	94
known driver	MLL3	chr7	151904374	151904523	149
known driver	MLL3	chr7	151848516	151848676	160
known driver	MLL3	chr7	151884336	151884571	235
known driver	MLL3	chr7	151900008	151900159	151
known driver	MLL3	chr7	151852984	151853152	168
known driver	MLL3	chr7	152132700	152132881	181
known driver	MLL3	chr7	151868338	151868437	99
known driver	MLL3	chr7	151876908	151877221	313
known driver	MLL3	chr7	151970779	151970962	183
known driver	MLL3	chr7	151843673	151843830	157
known driver	MLL3	chr7	151949620	151949810	190
known driver	MLL3	chr7	151896353	151896554	201
known driver	MLL3	chr7	152012212	152012433	221
known driver	MLL3	chr7	151932891	151933028	137
known driver	MLL3	chr7	151917597	151917830	233
known driver	MLL3	chr7	151919075	151919161	86
known driver	MLL3	chr7	151873265	151875105	1840
known driver	MLL3	chr7	151962112	151962304	192
known driver	MLL3	chr7	151933207	151933278	71
known driver	MLL3	chr7	151866260	151866344	84
known driver	MLL3	chr7	151892981	151893106	125
known driver	MLL3	chr7	151864220	151864473	253
known driver	MLL3	chr7	152027675	152027837	162
known driver	MLL3	chr7	152055661	152055770	109
known driver	MLL3	chr7	151927294	151927416	122
known driver	MLL3	chr7	151835858	151835999	141
known driver	MLL3	chr7	151833906	151834019	113
known driver	MLL3	chr7	151921509	151921711	202
known driver	MLL3	chr7	151842227	151842390	163
known driver	MLL3	chr7	151841787	151841976	189
known driver	MLL3	chr7	151949013	151949185	172
known driver	MLL3	chr7	151947927	151948061	134
known driver	MLL3	chr7	151891083	151891223	140
known driver	MLL3	chr7	151946950	151947048	98
known driver	MLL3	chr7	151853279	151853441	162
known driver	MLL3	chr7	151884789	151884942	153
known driver	MLL3	chr7	151859191	151860921	1730
known driver	MLL3	chr7	151854835	151855020	185
known driver	MLL3	chr7	151891303	151891356	53
known driver	MLL3	chr7	152041291	152041350	59
known driver	MLL3	chr7	151871205	151871337	132
known driver	MLL3	chr7	151855931	151856167	236
known driver	MLL3	chr7	151935781	151935921	140
known driver	MLL3	chr7	151926973	151927122	149
known driver	MLL3	chr7	151944976	151945715	739
known driver	MLL3	chr7	151891514	151891663	149
known driver	MLL3	chr7	151836260	151836354	94
known driver	ARID1A	chr1	27100060	27100218	158
known driver	ARID1A	chr1	27100282	27100399	117
known driver	ARID1A	chr1	27100809	27101721	912
known driver	ARID1A	chr1	27102057	27102208	151
known driver	ARID1A	chr1	27105503	27107257	1754
known driver	ARID1A	chr1	27059156	27059293	137
known driver	ARID1A	chr1	27087336	27087597	261
known driver	ARID1A	chr1	27087864	27087974	110
known driver	ARID1A	chr1	27088632	27088820	188
known driver	ARID1A	chr1	27089453	27089786	333
known driver	ARID1A	chr1	27092701	27092867	166
known driver	ARID1A	chr1	27092937	27093067	130
known driver	ARID1A	chr1	27097599	27097827	228
known driver	ARID1A	chr1	27098980	27099133	153
known driver	ARID1A	chr1	27099292	27099488	196
known driver	ARID1A	chr1	27099826	27099997	171
known driver	ARID1A	chr1	27056131	27056364	233
known driver	ARID1A	chr1	27057632	27058105	473
known driver	ARID1A	chr1	27022884	27024041	1157
known driver	ARID1A	chr1	27094270	27094502	232
known driver	ARID1B	chr6	157099053	157100615	1562
known driver	ARID1B	chr6	157150350	157150565	215
known driver	ARID1B	chr6	157256589	157256720	131
known driver	ARID1B	chr6	157357958	157358020	62
known driver	ARID1B	chr6	157192737	157192796	59
known driver	ARID1B	chr6	157222496	157222669	173
known driver	ARID1B	chr6	157454151	157454351	200
known driver	ARID1B	chr6	157469747	157470156	409
known driver	ARID1B	chr6	157405785	157406049	264
known driver	ARID1B	chr6	157495131	157495261	130
known driver	ARID1B	chr6	157495970	157496149	179
known driver	ARID1B	chr6	157502092	157502322	230
known driver	ARID1B	chr6	157505354	157505689	335
known driver	ARID1B	chr6	157507478	157507749	271
known driver	ARID1B	chr6	157510765	157510924	159
known driver	ARID1B	chr6	157511161	157511354	193
known driver	ARID1B	chr6	157517288	157517459	171
known driver	ARID1B	chr6	157519934	157520051	117
known driver	ARID1B	chr6	157431595	157431705	110
known driver	ARID1B	chr6	157521828	157522632	804
known driver	ARID1B	chr6	157524989	157525140	151
known driver	ARID1B	chr6	157488163	157488329	166
known driver	ARID1B	chr6	157527290	157529035	1745
known driver	ARID2	chr12	46243352	46243569	217
known driver	ARID2	chr12	46243808	46246689	2881
known driver	ARID2	chr12	46254573	46254742	169
known driver	ARID2	chr12	46285552	46285711	159
known driver	ARID2	chr12	46285783	46285889	106
known driver	ARID2	chr12	46287192	46287336	144
known driver	ARID2	chr12	46287402	46287518	116
known driver	ARID2	chr12	46298114	46298153	39
known driver	ARID2	chr12	46298706	46298871	165
known driver	ARID2	chr12	46231093	46231210	117
known driver	ARID2	chr12	46231270	46231500	230
known driver	ARID2	chr12	46233101	46233289	188
known driver	ARID2	chr12	46242608	46242763	155
known driver	ARID2	chr12	46123609	46123721	112
known driver	ARID2	chr12	46123816	46123930	114
known driver	ARID2	chr12	46124989	46125107	118
known driver	ARID2	chr12	46149703	46149763	60
known driver	ARID2	chr12	46169853	46169889	36
known driver	ARID2	chr12	46205190	46205344	154
known driver	ARID2	chr12	46211442	46211681	239
known driver	ARID2	chr12	46215192	46215280	88
known driver	ARID2	chr12	46230361	46230448	87
known driver	ARID2	chr12	46230513	46230784	271
known driver	ARID2	chr12	46240628	46240730	102
known driver	AXIN1	chr16	354293	354451	158
known driver	AXIN1	chr16	359962	360079	117
known driver	AXIN1	chr16	396137	397035	898
known driver	AXIN1	chr16	338111	338316	205
known driver	AXIN1	chr16	339429	339617	188
known driver	AXIN1	chr16	341179	341307	128
known driver	AXIN1	chr16	343477	343728	251
known driver	AXIN1	chr16	347711	348261	550
known driver	AXIN1	chr16	347045	347236	191
known driver	AXIN1	chr16	364532	364693	161
known driver	IDH1	chr2	209113079	209113394	315
known driver	IDH1	chr2	209108140	209108338	198
known driver	IDH1	chr2	209110032	209110158	126
known driver	IDH1	chr2	209116143	209116285	142
known driver	IDH1	chr2	209103784	209103967	183
known driver	IDH1	chr2	209101792	209101903	111
known driver	IDH1	chr2	209104576	209104737	161
known driver	IDH1	chr2	209106707	209106879	172
known driver	IDH2	chr15	90630660	90630817	157
known driver	IDH2	chr15	90628222	90628340	118
known driver	IDH2	chr15	90628037	90628150	113
known driver	IDH2	chr15	90628496	90628629	133
known driver	IDH2	chr15	90634774	90634886	112
known driver	IDH2	chr15	90631808	90631989	181
known driver	IDH2	chr15	90633700	90633886	186
known driver	IDH2	chr15	90645497	90645632	135
known driver	IDH2	chr15	90627487	90627595	108
known driver	IDH2	chr15	90630333	90630505	172
known driver	IDH2	chr15	90631580	90631744	164
known driver	JAK1	chr1	65303604	65303797	193
known driver	JAK1	chr1	65323328	65323472	144
known driver	JAK1	chr1	65301770	65301908	138
known driver	JAK1	chr1	65321181	65321391	210
known driver	JAK1	chr1	65309736	65309908	172
known driver	JAK1	chr1	65304137	65304282	145
known driver	JAK1	chr1	65301068	65301199	131
known driver	JAK1	chr1	65306917	65307032	115
known driver	JAK1	chr1	65300234	65300350	116
known driver	JAK1	chr1	65310426	65310582	156
known driver	JAK1	chr1	65305275	65305488	213
known driver	JAK1	chr1	65313204	65313368	164
known driver	JAK1	chr1	65351931	65351957	26
known driver	JAK1	chr1	65307123	65307294	171
known driver	JAK1	chr1	65312321	65312429	108
known driver	JAK1	chr1	65325777	65325955	178
known driver	JAK1	chr1	65316476	65316603	127
known driver	JAK1	chr1	65332538	65332901	363
known driver	JAK1	chr1	65311185	65311333	148
known driver	JAK1	chr1	65348949	65349168	219
known driver	JAK1	chr1	65330459	65330665	206
known driver	JAK1	chr1	65339042	65339216	174
known driver	JAK1	chr1	65334983	65335167	184
known driver	JAK1	chr1	65344697	65344841	144
known driver	TTN	chr2	179585101	179585400	299
known driver	TTN	chr2	179557213	179557317	104
known driver	TTN	chr2	179584699	179585001	302
known driver	TTN	chr2	179405998	179406321	323
known driver	TTN	chr2	179470130	179470450	320
known driver	TTN	chr2	179556732	179556836	104
known driver	TTN	chr2	179404784	179405107	323
known driver	TTN	chr2	179471737	179472051	314
known driver	TTN	chr2	179451221	179451544	323
known driver	TTN	chr2	179447012	179447329	317
known driver	TTN	chr2	179446622	179446945	323
known driver	TTN	chr2	179590484	179590783	299
known driver	TTN	chr2	179554529	179554633	104
known driver	TTN	chr2	179585637	179585939	302
known driver	TTN	chr2	179532158	179532262	104
known driver	TTN	chr2	179586563	179586871	308
known driver	TTN	chr2	179534089	179534184	95
known driver	TTN	chr2	179531952	179532056	104
known driver	TTN	chr2	179451834	179452154	320
known driver	TTN	chr2	179587762	179588061	299
known driver	TTN	chr2	179561837	179561905	68
known driver	TTN	chr2	179587375	179587674	299
known driver	TTN	chr2	179534934	179535032	98
known driver	TTN	chr2	179404098	179404703	605
known driver	TTN	chr2	179554006	179554110	104
known driver	TTN	chr2	179591806	179592108	302
known driver	TTN	chr2	179592301	179592600	299
known driver	TTN	chr2	179632475	179632661	186
known driver	TTN	chr2	179532354	179532458	104
known driver	TTN	chr2	179407785	179408399	614
known driver	TTN	chr2	179534308	179534412	104
known driver	TTN	chr2	179452615	179452956	341
known driver	TTN	chr2	179453254	179456241	2987
known driver	TTN	chr2	179588134	179588433	299
known driver	TTN	chr2	179563559	179563651	92
known driver	TTN	chr2	179588976	179589275	299
known driver	TTN	chr2	179590084	179590386	302
known driver	TTN	chr2	179402058	179402654	596
known driver	TTN	chr2	179554231	179554332	101
known driver	TTN	chr2	179584270	179584569	299
known driver	TTN	chr2	179406980	179407300	320
known driver	TTN	chr2	179407378	179407686	308
known driver	TTN	chr2	179391728	179392044	316
known driver	TTN	chr2	179558325	179558426	101
known driver	TTN	chr2	179558638	179558745	107
known driver	TTN	chr2	179559315	179559413	98
known driver	TTN	chr2	179559545	179559643	98
known driver	TTN	chr2	179588572	179588880	308
known driver	TTN	chr2	179560581	179561006	425
known driver	TTN	chr2	179401654	179401980	326
known driver	TTN	chr2	179457491	179457820	329
known driver	TTN	chr2	179403256	179403576	320
known driver	TTN	chr2	179403662	179403988	326
known driver	TTN	chr2	179682242	179682294	52
known driver	TTN	chr2	179486556	179486745	189
known driver	TTN	chr2	179593216	179593515	299
known driver	TTN	chr2	179593607	179593906	299
known driver	TTN	chr2	179452232	179452537	305
known driver	TTN	chr2	179408550	179408852	302
known driver	TTN	chr2	179408917	179409243	326
known driver	TTN	chr2	179560064	179560147	83
known driver	TTN	chr2	179456694	179457014	320
known driver	TTN	chr2	179457095	179457397	302
known driver	TTN	chr2	179553769	179553873	104
known driver	TTN	chr2	179665111	179665419	308
known driver	TTN	chr2	179666854	179667078	224
known driver	TTN	chr2	179498129	179498413	284
known driver	TTN	chr2	179592826	179593134	308
known driver	TTN	chr2	179527682	179527792	110
known driver	TTN	chr2	179441639	179442247	608
known driver	TTN	chr2	179442318	179442635	317
known driver	TTN	chr2	179442704	179442922	218
known driver	TTN	chr2	179586975	179587283	308
known driver	TTN	chr2	179550234	179550335	101
known driver	TTN	chr2	179444277	179444585	308
known driver	TTN	chr2	179444655	179444966	311
known driver	TTN	chr2	179445038	179445346	308
known driver	TTN	chr2	179446215	179446541	326
known driver	TTN	chr2	179518924	179519028	104
known driver	TTN	chr2	179669268	179669392	124
known driver	TTN	chr2	179424027	179441153	17126
known driver	TTN	chr2	179441245	179441568	323
known driver	TTN	chr2	179499082	179499366	284
known driver	TTN	chr2	179499439	179499586	147
known driver	TTN	chr2	179499881	179500041	160
known driver	TTN	chr2	179522793	179522894	101
known driver	TTN	chr2	179443522	179444130	608
known driver	TTN	chr2	179456315	179456629	314
known driver	TTN	chr2	179523421	179523531	110
known driver	TTN	chr2	179523721	179523825	104
known driver	TTN	chr2	179523888	179523992	104
known driver	TTN	chr2	179457889	179458212	323
known driver	TTN	chr2	179519161	179519271	110
known driver	TTN	chr2	179447656	179447964	308
known driver	TTN	chr2	179498533	179498820	287
known driver	TTN	chr2	179458677	179458979	302
known driver	TTN	chr2	179527982	179528086	104
known driver	TTN	chr2	179528149	179528253	104
known driver	TTN	chr2	179528343	179528447	104
known driver	TTN	chr2	179522988	179523092	104
known driver	TTN	chr2	179528731	179528835	104
known driver	TTN	chr2	179552827	179552961	134
known driver	TTN	chr2	179553393	179553515	122
known driver	TTN	chr2	179664541	179664647	106
known driver	TTN	chr2	179529568	179529663	95
known driver	TTN	chr2	179530093	179530197	104
known driver	TTN	chr2	179530424	179530528	104
known driver	TTN	chr2	179531540	179531638	98
known driver	TTN	chr2	179466718	179466887	169
known driver	TTN	chr2	179466998	179467327	329
known driver	TTN	chr2	179468592	179469042	450
known driver	TTN	chr2	179469424	179469635	211
known driver	TTN	chr2	179469703	179470032	329
known driver	TTN	chr2	179634395	179634676	281
known driver	TTN	chr2	179634776	179635057	281
known driver	TTN	chr2	179472117	179472422	305
known driver	TTN	chr2	179472501	179472818	317
known driver	TTN	chr2	179472894	179473214	320
known driver	TTN	chr2	179473322	179473645	323
known driver	TTN	chr2	179473924	179474307	383
known driver	TTN	chr2	179474400	179474723	323
known driver	TTN	chr2	179448323	179448643	320
known driver	TTN	chr2	179448992	179449315	323
known driver	TTN	chr2	179449385	179449705	320
known driver	TTN	chr2	179449788	179450084	296
known driver	TTN	chr2	179476773	179476899	126
known driver	TTN	chr2	179476993	179477313	320
known driver	TTN	chr2	179523184	179523288	104
known driver	TTN	chr2	179478467	179478674	207
known driver	TTN	chr2	179478768	179479085	317
known driver	TTN	chr2	179479182	179479490	308
known driver	TTN	chr2	179526475	179526579	104
known driver	TTN	chr2	179526664	179526765	101
known driver	TTN	chr2	179526858	179526959	101
known driver	TTN	chr2	179527445	179527549	104
known driver	TTN	chr2	179480357	179480525	168
known driver	TTN	chr2	179459060	179459383	323
known driver	TTN	chr2	179460223	179460546	323
known driver	TTN	chr2	179462254	179462556	302
known driver	TTN	chr2	179528535	179528639	104
known driver	TTN	chr2	179549969	179550067	98
known driver	TTN	chr2	179659638	179659989	351
known driver	TTN	chr2	179664203	179664468	265
known driver	TTN	chr2	179529370	179529474	104
known driver	TTN	chr2	179484704	179484849	145
known driver	TTN	chr2	179484933	179485362	429
known driver	TTN	chr2	179485431	179485730	299
known driver	TTN	chr2	179485818	179486105	287
known driver	TTN	chr2	179486191	179486478	287
known driver	TTN	chr2	179516812	179516916	104
known driver	TTN	chr2	179487386	179487504	118
known driver	TTN	chr2	179392162	179392485	323
known driver	TTN	chr2	179392990	179393164	174
known driver	TTN	chr2	179393244	179393956	712
known driver	TTN	chr2	179394676	179394853	177
known driver	TTN	chr2	179394957	179400586	5629
known driver	TTN	chr2	179400698	179401312	614
known driver	TTN	chr2	179496863	179497150	287
known driver	TTN	chr2	179497242	179497529	287
known driver	TTN	chr2	179497634	179497781	147
known driver	TTN	chr2	179497903	179498063	160
known driver	TTN	chr2	179566244	179566324	80
known driver	TTN	chr2	179566756	179566803	47
known driver	TTN	chr2	179566884	179566982	98
known driver	TTN	chr2	179567170	179567400	230
known driver	TTN	chr2	179568863	179569144	281
known driver	TTN	chr2	179569226	179569514	288
known driver	TTN	chr2	179569593	179569703	110
known driver	TTN	chr2	179410104	179410430	326
known driver	TTN	chr2	179410536	179410853	317
known driver	TTN	chr2	179410928	179411239	311
known driver	TTN	chr2	179411316	179411642	326
known driver	TTN	chr2	179411719	179412042	323
known driver	TTN	chr2	179412123	179414210	2087
known driver	TTN	chr2	179458284	179458604	320
known driver	TTN	chr2	179414702	179415010	308
known driver	TTN	chr2	179481195	179481367	172
known driver	TTN	chr2	179481445	179481750	305
known driver	TTN	chr2	179481836	179481971	135
known driver	TTN	chr2	179462624	179462795	171
known driver	TTN	chr2	179463222	179463391	169
known driver	TTN	chr2	179463464	179463799	335
known driver	TTN	chr2	179529176	179529274	98
known driver	TTN	chr2	179484337	179484624	287
known driver	TTN	chr2	179582659	179582958	299
known driver	TTN	chr2	179583038	179583337	299
known driver	TTN	chr2	179583411	179583710	299
known driver	TTN	chr2	179583880	179584188	308
known driver	TTN	chr2	179516600	179516704	104
known driver	TTN	chr2	179628893	179629039	146
known driver	TTN	chr2	179516980	179517084	104
known driver	TTN	chr2	179517174	179517278	104
known driver	TTN	chr2	179517369	179517473	104
known driver	TTN	chr2	179443327	179443452	125
known driver	TTN	chr2	179517954	179518058	104
known driver	TTN	chr2	179518143	179518244	101
known driver	TTN	chr2	179518337	179518438	101
known driver	TTN	chr2	179518533	179518634	101
known driver	TTN	chr2	179518728	179518832	104
known driver	TTN	chr2	179537351	179537440	89
known driver	TTN	chr2	179538349	179538447	98
known driver	TTN	chr2	179519461	179519565	104
known driver	TTN	chr2	179519628	179519732	104
known driver	TTN	chr2	179522214	179522318	104
known driver	TTN	chr2	179522403	179522504	101
known driver	TTN	chr2	179522597	179522698	101
known driver	TTN	chr2	179542337	179542654	317
known driver	TTN	chr2	179594004	179594303	299
known driver	TTN	chr2	179594380	179594682	302
known driver	TTN	chr2	179594809	179595108	299
known driver	TTN	chr2	179595221	179595529	308
known driver	TTN	chr2	179595641	179595940	299
known driver	TTN	chr2	179596021	179596320	299
known driver	TTN	chr2	179596409	179596708	299
known driver	TTN	chr2	179414286	179414606	320
known driver	TTN	chr2	179527054	179527155	101
known driver	TTN	chr2	179527249	179527353	104
known driver	TTN	chr2	179597955	179598254	299
known driver	TTN	chr2	179598330	179598629	299
known driver	TTN	chr2	179482041	179482249	208
known driver	TTN	chr2	179482495	179482818	323
known driver	TTN	chr2	179482905	179483228	323
known driver	TTN	chr2	179483300	179483590	290
known driver	TTN	chr2	179582239	179582547	308
known driver	TTN	chr2	179610301	179616776	6475
known driver	TTN	chr2	179617840	179617917	77
known driver	TTN	chr2	179620938	179621534	596
known driver	TTN	chr2	179622258	179622653	395
known driver	TTN	chr2	179623700	179623909	209
known driver	TTN	chr2	179516382	179516486	104
known driver	TTN	chr2	179629243	179629548	305
known driver	TTN	chr2	179631097	179631349	252
known driver	TTN	chr2	179632730	179632892	162
known driver	TTN	chr2	179633389	179633670	281
known driver	TTN	chr2	179489181	179489468	287
known driver	TTN	chr2	179489989	179490133	144
known driver	TTN	chr2	179535806	179535907	101
known driver	TTN	chr2	179536687	179537006	319
known driver	TTN	chr2	179537123	179537218	95
known driver	TTN	chr2	179495750	179496037	287
known driver	TTN	chr2	179638178	179638462	284
known driver	TTN	chr2	179539030	179539146	116
known driver	TTN	chr2	179474806	179475126	320
known driver	TTN	chr2	179475709	179476008	299
known driver	TTN	chr2	179476088	179476414	326
known driver	TTN	chr2	179476474	179476691	217
known driver	TTN	chr2	179642136	179642321	185
known driver	TTN	chr2	179542841	179542945	104
known driver	TTN	chr2	179477489	179477809	320
known driver	TTN	chr2	179477877	179478013	136
known driver	TTN	chr2	179645837	179646000	163
known driver	TTN	chr2	179646928	179647164	236
known driver	TTN	chr2	179647255	179647339	84
known driver	TTN	chr2	179647522	179647801	279
known driver	TTN	chr2	179596782	179597084	302
known driver	TTN	chr2	179480023	179480221	198
known driver	TTN	chr2	179546377	179546475	98
known driver	TTN	chr2	179547413	179547640	227
known driver	TTN	chr2	179547927	179548028	101
known driver	TTN	chr2	179599044	179599343	299
known driver	TTN	chr2	179599423	179599725	302
known driver	TTN	chr2	179600227	179600811	584
known driver	TTN	chr2	179602798	179603097	299
known driver	TTN	chr2	179603857	179606658	2801
known driver	TTN	chr2	179419581	179419889	308
known driver	TTN	chr2	179421564	179421881	317
known driver	TTN	chr2	179421969	179422292	323
known driver	TTN	chr2	179422364	179422972	608
known driver	TTN	chr2	179423057	179423374	317
known driver	TTN	chr2	179466374	179466524	150
known driver	TTN	chr2	179466598	179466651	53
known driver	TTN	chr2	179640072	179641786	1714
known driver	TTN	chr2	179641865	179642054	189
known driver	TTN	chr2	179540387	179540491	104
known driver	TTN	chr2	179642420	179642712	292
known driver	TTN	chr2	179517564	179517668	104
known driver	TTN	chr2	179494017	179494180	163
known driver	TTN	chr2	179494957	179495104	147
known driver	TTN	chr2	179495520	179495680	160
known driver	TTN	chr2	179637825	179638106	281
known driver	TTN	chr2	179574282	179574593	311
known driver	TTN	chr2	179565836	179565940	104
known driver	TTN	chr2	179638923	179639210	287
known driver	TTN	chr2	179639637	179639939	302
known driver	TTN	chr2	179577031	179577330	299
known driver	TTN	chr2	179577413	179577712	299
known driver	TTN	chr2	179548715	179548819	104
known driver	TTN	chr2	179549046	179549150	104
known driver	TTN	chr2	179500156	179500452	296
known driver	TTN	chr2	179569890	179570094	204
known driver	TTN	chr2	179571170	179571476	306
known driver	TTN	chr2	179571578	179571691	113
known driver	TTN	chr2	179572242	179572550	308
known driver	TTN	chr2	179464270	179464587	317
known driver	TTN	chr2	179575351	179575659	308
known driver	TTN	chr2	179575778	179576086	308
known driver	TTN	chr2	179576660	179576959	299
known driver	TTN	chr2	179516169	179516273	104
known driver	TTN	chr2	179597550	179597858	308
known driver	TTN	chr2	179539755	179539850	95
known driver	TTN	chr2	179654076	179654234	158
known driver	TTN	chr2	179549382	179549486	104
known driver	TTN	chr2	179549622	179549726	104
known driver	TTN	chr2	179659115	179659288	173
known driver	TTN	chr2	179580209	179580511	302
known driver	TTN	chr2	179463862	179464182	320
known driver	TTN	chr2	179543463	179543567	104
known driver	TTN	chr2	179465570	179465908	338
known driver	TTN	chr2	179465981	179466301	320
known driver	TTN	chr2	179515959	179516057	98
known driver	TTN	chr2	179597156	179597455	299
known driver	TTN	chr2	179648786	179649088	302
known driver	TTN	chr2	179650564	179650878	314
known driver	TTN	chr2	179506948	179507054	106
known driver	TTN	chr2	179540637	179540732	95
known driver	TTN	chr2	179643590	179643855	265
known driver	TTN	chr2	179517757	179517861	104
known driver	TTN	chr2	179635128	179635412	284
known driver	TTN	chr2	179635927	179636208	281
known driver	TTN	chr2	179581811	179582119	308
known driver	TTN	chr2	179544055	179544153	98
known driver	TTN	chr2	179638554	179638847	293
known driver	TTN	chr2	179479563	179479705	142
known driver	TTN	chr2	179504764	179504847	83
known driver	TTN	chr2	179655424	179655582	158
known driver	TTN	chr2	179650336	179650479	143
known driver	TTN	chr2	179505957	179506052	95
known driver	TTN	chr2	179654694	179654852	158
known driver	TTN	chr2	179500679	179500978	299
known driver	TTN	chr2	179643945	179644199	254
known driver	TTN	chr2	179644716	179644942	226
known driver	TTN	chr2	179543130	179543234	104
known driver	TTN	chr2	179509264	179509353	89
known driver	TTN	chr2	179514533	179514631	98
known driver	TTN	chr2	179544315	179544419	104
known driver	TTN	chr2	179515467	179515575	108
known driver	TTN	chr2	179418218	179418544	326
known driver	TTN	chr2	179577801	179578109	308
known driver	TTN	chr2	179505257	179505367	110
known driver	TTN	chr2	179648436	179648522	86
known driver	TTN	chr2	179504415	179504525	110
known driver	TTN	chr2	179511780	179511881	101
known driver	TTN	chr2	179656788	179656934	146
known driver	TTN	chr2	179658120	179658278	158
known driver	TTN	chr2	179579008	179579310	302
known driver	TTN	chr2	179545795	179545908	113
known driver	TTN	chr2	179501114	179501536	422
known driver	TTN	chr2	179514880	179515008	128
known driver	TTN	chr2	179502085	179502156	71
known driver	TTN	chr2	179579702	179580001	299
known driver	TTN	chr2	179546092	179546187	95
known driver	TTN	chr2	179541917	179542024	107
known driver	TTN	chr2	179578613	179578912	299
known driver	TTN	chr2	179514270	179514368	98
known driver	TTN	chr2	179416346	179418133	1787
known driver	TTN	chr2	179418630	179418953	323
known driver	TTN	chr2	179511201	179511296	95
known driver	TTN	chr2	179510636	179510767	131
known driver	TTN	chr2	179544970	179545068	98
known driver	TTN	chr2	179419169	179419489	320
known driver	TTN	chr2	179415683	179415997	314
known driver	TTN	chr2	179544610	179544792	182
known driver	TTN	chr2	179513964	179514068	104
known driver	TTN	chr2	179512097	179512201	104
max	ADCY2	chr5	7743770	7743875	105
max	ADCY2	chr5	7727266	7727384	118
max	ADCY2	chr5	7717259	7717360	101
max	ADCY2	chr5	7724647	7724737	90
max	ADCY2	chr5	7820667	7820812	145
max	ADCY2	chr5	7757551	7757709	158
max	ADCY2	chr5	7712958	7713022	64
max	ADCY2	chr5	7706846	7707025	179
max	ADCY2	chr5	7709313	7709510	197
max	ADCY2	chr5	7826704	7826726	22
max	ADCY2	chr5	7826821	7826994	173
max	ADCY2	chr5	7784467	7784572	105
max	ADCY2	chr5	7695854	7695986	132
max	ADCY2	chr5	7654119	7654319	200
max	ADCY2	chr5	7707808	7707961	153
max	ADCY2	chr5	7396399	7396629	230
max	ADCY2	chr5	7816968	7817103	135
max	ADCY2	chr5	7804687	7804815	128
max	ADCY2	chr5	7766789	7766929	140
max	ADCY2	chr5	7698349	7698497	148
max	ADCY2	chr5	7690793	7690962	169
max	ADCY2	chr5	7414675	7414893	218
max	ADCY2	chr5	7789744	7789923	179
max	ADCY2	chr5	7802320	7802487	167
max	ADCY2	chr5	7520840	7521022	182
max	ADCY2	chr5	7626269	7626439	170
max	ADCY2	chr5	7773034	7773224	190
max	AR	chrX	66943517	66943693	176
max	AR	chrX	66764978	66766618	1640
max	AR	chrX	66941664	66941815	151
max	AR	chrX	66914504	66914574	70
max	AR	chrX	66863087	66863259	172
max	AR	chrX	66905841	66905978	137
max	AR	chrX	66788834	66788874	40
max	AR	chrX	66942634	66942836	202
max	AR	chrX	66931233	66931541	308
max	AR	chrX	66900551	66900606	55
max	AR	chrX	66937309	66937474	165
max	ATAD3B	chr1	1423232	1423304	72
max	ATAD3B	chr1	1407254	1407479	225
max	ATAD3B	chr1	1424566	1424664	98
max	ATAD3B	chr1	1418416	1418496	80
max	ATAD3B	chr1	1417507	1417693	186
max	ATAD3B	chr1	1421913	1422058	145
max	ATAD3B	chr1	1425839	1426061	222
max	ATAD3B	chr1	1417914	1418052	138
max	ATAD3B	chr1	1421479	1421625	146
max	ATAD3B	chr1	1420385	1420561	176
max	ATAD3B	chr1	1414418	1414498	80
max	ATAD3B	chr1	1425623	1425814	191
max	ATAD3B	chr1	1416236	1416326	90
max	ATAD3B	chr1	1421148	1421234	86
max	ATAD3B	chr1	1430854	1431207	353
max	ATAD3B	chr1	1414013	1414135	122
max	ATAD3B	chr1	1412643	1412740	97
max	BRD9	chr5	881211	881307	96
max	BRD9	chr5	879898	880014	116
max	BRD9	chr5	865518	865706	188
max	BRD9	chr5	878459	878612	153
max	BRD9	chr5	883436	883532	96
max	BRD9	chr5	870577	870700	123
max	BRD9	chr5	887465	887596	131
max	BRD9	chr5	886696	886892	196
max	BRD9	chr5	869372	869529	157
max	BRD9	chr5	876205	876337	132
max	BRD9	chr5	871630	871689	59
max	BRD9	chr5	884042	884195	153
max	BRD9	chr5	892710	892782	72
max	BRD9	chr5	889691	889824	133
max	BRD9	chr5	864572	864693	121
max	BRD9	chr5	891259	891412	153
max	BRD9	chr5	891744	891979	235
max	BRD9	chr5	889125	889290	165
max	BRD9	chr5	889844	889891	47
max	CACNA2D4	chr12	2027402	2027649	247
max	CACNA2D4	chr12	1965339	1965405	66
max	CACNA2D4	chr12	1904454	1904557	103
max	CACNA2D4	chr12	1902810	1902935	125
max	CACNA2D4	chr12	1955749	1955865	116
max	CACNA2D4	chr12	1919698	1919763	65
max	CACNA2D4	chr12	2024348	2024403	55
max	CACNA2D4	chr12	2024009	2024111	102
max	CACNA2D4	chr12	1963106	1963220	114
max	CACNA2D4	chr12	1988959	1989057	98
max	CACNA2D4	chr12	1994142	1994252	110
max	CACNA2D4	chr12	1995378	1995549	171
max	CACNA2D4	chr12	1965167	1965285	118
max	CACNA2D4	chr12	1910198	1910294	96
max	CACNA2D4	chr12	1919433	1919516	83
max	CACNA2D4	chr12	1910729	1910820	91
max	CACNA2D4	chr12	1993923	1994057	134
max	CACNA2D4	chr12	1920817	1920899	82
max	CACNA2D4	chr12	1953557	1953705	148
max	CACNA2D4	chr12	1949894	1949995	101
max	CACNA2D4	chr12	1906573	1906711	138
max	CACNA2D4	chr12	1996164	1996245	81
max	CACNA2D4	chr12	1909537	1909614	77
max	CACNA2D4	chr12	1908830	1908871	41
max	CACNA2D4	chr12	1988111	1988212	101
max	CACNA2D4	chr12	1904821	1904956	135
max	CACNA2D4	chr12	1984406	1984513	107
max	CACNA2D4	chr12	1987470	1987565	95
max	CACNA2D4	chr12	1909155	1909228	73
max	CACNA2D4	chr12	2016595	2016747	152
max	CACNA2D4	chr12	1995120	1995215	95
max	CACNA2D4	chr12	1967732	1967820	88
max	CACNA2D4	chr12	2022178	2022315	137
max	CACNA2D4	chr12	1969300	1969382	82
max	CACNA2D4	chr12	1983759	1983851	92
max	CACNA2D4	chr12	1993398	1993497	99
max	CACNA2D4	chr12	1992022	1992176	154
max	CACNA2D4	chr12	2019061	2019141	80
max	CACNA2D4	chr12	2017030	2017213	183
max	COL11A1	chr1	103348744	103348877	133
max	COL11A1	chr1	103345228	103345482	254
max	COL11A1	chr1	103449683	103449757	74
max	COL11A1	chr1	103352352	103352622	270
max	COL11A1	chr1	103440375	103440449	74
max	COL11A1	chr1	103444927	103445001	74
max	COL11A1	chr1	103355000	103355128	128
max	COL11A1	chr1	103461534	103461608	74
max	COL11A1	chr1	103354411	103354485	74
max	COL11A1	chr1	103445142	103445178	36
max	COL11A1	chr1	103444605	103444670	65
max	COL11A1	chr1	103435764	103435838	74
max	COL11A1	chr1	103431032	103431106	74
max	COL11A1	chr1	103354268	103354324	56
max	COL11A1	chr1	103477958	103478035	77
max	COL11A1	chr1	103468760	103468834	74
max	COL11A1	chr1	103379182	103379256	74
max	COL11A1	chr1	103474008	103474082	74
max	COL11A1	chr1	103463855	103463929	74
max	COL11A1	chr1	103444405	103444479	74
max	COL11A1	chr1	103461409	103461474	65
max	COL11A1	chr1	103428198	103428326	128
max	COL11A1	chr1	103468292	103468357	65
max	COL11A1	chr1	103470153	103470227	74
max	COL11A1	chr1	103347242	103347331	89
max	COL11A1	chr1	103469989	103470054	65
max	COL11A1	chr1	103462625	103462690	65
max	COL11A1	chr1	103364211	103364339	128
max	COL11A1	chr1	103354122	103354196	74
max	COL11A1	chr1	103455063	103455137	74
max	COL11A1	chr1	103471807	103471881	74
max	COL11A1	chr1	103399994	103400122	128
max	COL11A1	chr1	103364486	103364560	74
max	COL11A1	chr1	103444253	103444318	65
max	COL11A1	chr1	103467973	103468047	74
max	COL11A1	chr1	103405872	103406000	128
max	COL11A1	chr1	103487252	103487335	83
max	COL11A1	chr1	103343564	103343731	167
max	COL11A1	chr1	103453178	103453306	128
max	COL11A1	chr1	103427721	103427831	110
max	COL11A1	chr1	103363670	103363744	74
max	COL11A1	chr1	103471383	103471457	74
max	COL11A1	chr1	103377704	103377778	74
max	COL11A1	chr1	103467470	103467535	65
max	COL11A1	chr1	103385856	103385930	74
max	COL11A1	chr1	103484363	103484425	62
max	COL11A1	chr1	103400605	103400679	74
max	COL11A1	chr1	103355996	103356070	74
max	COL11A1	chr1	103491066	103491179	113
max	COL11A1	chr1	103548350	103548538	188
max	COL11A1	chr1	103573618	103573744	126
max	COL11A1	chr1	103471613	103471687	74
max	COL11A1	chr1	103427411	103427485	74
max	COL11A1	chr1	103379897	103379971	74
max	COL11A1	chr1	103387063	103387137	74
max	COL11A1	chr1	103483365	103483448	83
max	COL11A1	chr1	103388881	103388955	74
max	COL11A1	chr1	103404580	103404654	74
max	COL11A1	chr1	103540163	103540346	183
max	COL11A1	chr1	103496619	103496810	191
max	COL11A1	chr1	103544203	103544437	234
max	COL11A1	chr1	103491761	103491898	137
max	COL11A1	chr1	103488287	103488562	275
max	COL11A1	chr1	103480056	103480160	104
max	COL11A1	chr1	103412394	103412522	128
max	COL11A1	chr1	103380249	103380377	128
max	COL11A1	chr1	103381176	103381250	74
max	COL11A1	chr1	103491345	103491518	173
max	COL11A1	chr1	103481213	103481308	95
max	CPA2	chr7	129921933	129922038	105
max	CPA2	chr7	129919292	129919512	220
max	CPA2	chr7	129906711	129906802	91
max	CPA2	chr7	129909498	129909653	155
max	CPA2	chr7	129908758	129908860	102
max	CPA2	chr7	129913535	129913624	89
max	CPA2	chr7	129917655	129917766	111
max	CPA2	chr7	129914978	129915097	119
max	CPA2	chr7	129929389	129929597	208
max	CPA2	chr7	129916457	129916588	131
max	CPA2	chr7	129912905	129913027	122
max	CPA2	chr7	129910522	129910638	116
max	EPS15	chr1	51868096	51868207	111
max	EPS15	chr1	51869080	51869214	134
max	EPS15	chr1	51864693	51864847	154
max	EPS15	chr1	51938520	51938630	110
max	EPS15	chr1	51912621	51912787	166
max	EPS15	chr1	51822361	51822528	167
max	EPS15	chr1	51910550	51910727	177
max	EPS15	chr1	51860042	51860129	87
max	EPS15	chr1	51866579	51866635	56
max	EPS15	chr1	51913707	51913817	110
max	EPS15	chr1	51875196	51875378	182
max	EPS15	chr1	51924176	51924415	239
max	EPS15	chr1	51887447	51887638	191
max	EPS15	chr1	51929334	51929480	146
max	EPS15	chr1	51826832	51827037	205
max	EPS15	chr1	51937351	51937419	68
max	EPS15	chr1	51871566	51871790	224
max	EPS15	chr1	51888869	51888960	91
max	EPS15	chr1	51831614	51831711	97
max	EPS15	chr1	51873796	51874014	218
max	EPS15	chr1	51906008	51906114	106
max	EPS15	chr1	51930922	51931008	86
max	EPS15	chr1	51946934	51946996	62
max	EPS15	chr1	51829527	51829710	183
max	EPS15	chr1	51926752	51926832	80
max	EPS15	chr1	51934134	51934250	116
max	EPS15	chr1	51984860	51984913	53
max	FAM5C	chr1	190233984	190234195	211
max	FAM5C	chr1	190250679	190250890	211
max	FAM5C	chr1	190423774	190424030	256
max	FAM5C	chr1	190129787	190130030	243
max	FAM5C	chr1	190067137	190068274	1137
max	FAM5C	chr1	190203491	190203617	126
max	FAM5C	chr1	190195201	190195458	257
max	GJA1	chr6	121767983	121769152	1169
max	IGSF3	chr1	117156376	117156807	431
max	IGSF3	chr1	117158691	117159089	398
max	IGSF3	chr1	117208895	117208958	63
max	IGSF3	chr1	117149103	117149183	80
max	IGSF3	chr1	117146235	117146657	422
max	IGSF3	chr1	117127256	117127684	428
max	IGSF3	chr1	117150553	117150963	410
max	IGSF3	chr1	117131305	117131736	431
max	IGSF3	chr1	117142552	117142977	425
max	IGSF3	chr1	117122003	117122509	506
max	IGSF3	chr1	117119923	117120194	271
max	IL6ST	chr5	55247281	55247442	161
max	IL6ST	chr5	55247746	55247913	167
max	IL6ST	chr5	55243310	55243427	117
max	IL6ST	chr5	55264093	55264234	141
max	IL6ST	chr5	55253026	55253129	103
max	IL6ST	chr5	55259963	55260150	187
max	IL6ST	chr5	55265367	55265693	326
max	IL6ST	chr5	55246007	55246041	34
max	IL6ST	chr5	55272032	55272116	84
max	IL6ST	chr5	55256219	55256399	180
max	IL6ST	chr5	55250627	55250830	203
max	IL6ST	chr5	55236899	55237657	758
max	IL6ST	chr5	55238487	55238589	102
max	IL6ST	chr5	55255460	55255509	49
max	IL6ST	chr5	55259169	55259344	175
max	IL6ST	chr5	55251842	55252073	231
max	IL6ST	chr5	55248067	55248189	122
max	IRF2	chr4	185349817	185349961	144
max	IRF2	chr4	185350121	185350228	107
max	IRF2	chr4	185340612	185340732	120
max	IRF2	chr4	185328322	185328447	125
max	IRF2	chr4	185309901	185310230	329
max	IRF2	chr4	185329301	185329439	138
max	IRF2	chr4	185311846	185311913	67
max	IRF2	chr4	185320058	185320243	185
max	IRF2	chr4	185339310	185339377	67
max	IRF2	chr4	185339649	185339872	223
max	LRP1B	chr2	141526771	141526923	152
max	LRP1B	chr2	141459985	141460132	147
max	LRP1B	chr2	141474240	141474395	155
max	LRP1B	chr2	141473531	141473681	150
max	LRP1B	chr2	141092011	141092138	127
max	LRP1B	chr2	142044318	142044361	43
max	LRP1B	chr2	141055366	141055548	182
max	LRP1B	chr2	141122219	141122362	143
max	LRP1B	chr2	141072493	141072678	185
max	LRP1B	chr2	141081451	141081645	194
max	LRP1B	chr2	141643696	141643914	218
max	LRP1B	chr2	142012080	142012220	140
max	LRP1B	chr2	141986741	141987019	278
max	LRP1B	chr2	141031982	141032177	195
max	LRP1B	chr2	141660478	141660744	266
max	LRP1B	chr2	141093173	141093417	244
max	LRP1B	chr2	141641375	141641600	225
max	LRP1B	chr2	141116379	141116525	146
max	LRP1B	chr2	141026826	141026960	134
max	LRP1B	chr2	141027800	141027925	125
max	LRP1B	chr2	141083320	141083457	137
max	LRP1B	chr2	142888206	142888308	102
max	LRP1B	chr2	141945979	141946162	183
max	LRP1B	chr2	141607660	141607908	248
max	LRP1B	chr2	141128268	141128421	153
max	LRP1B	chr2	142004784	142004933	149
max	LRP1B	chr2	142567837	142567980	143
max	LRP1B	chr2	141004644	141004741	97
max	LRP1B	chr2	141108355	141108617	262
max	LRP1B	chr2	142237923	142238129	206
max	LRP1B	chr2	141115537	141115695	158
max	LRP1B	chr2	140997000	140997111	111
max	LRP1B	chr2	141762893	141763036	143
max	LRP1B	chr2	141597549	141597664	115
max	LRP1B	chr2	141128737	141128864	127
max	LRP1B	chr2	141665435	141665656	221
max	LRP1B	chr2	141528439	141528585	146
max	LRP1B	chr2	141819609	141819852	243
max	LRP1B	chr2	141533656	141533817	161
max	LRP1B	chr2	141359008	141359218	210
max	LRP1B	chr2	141751553	141751714	161
max	LRP1B	chr2	141571215	141571385	170
max	LRP1B	chr2	141459699	141459871	172
max	LRP1B	chr2	141267486	141267635	149
max	LRP1B	chr2	141215021	141215230	209
max	LRP1B	chr2	141806544	141806801	257
max	LRP1B	chr2	141816441	141816633	192
max	LRP1B	chr2	141771114	141771324	210
max	LRP1B	chr2	141609210	141609362	152
max	LRP1B	chr2	141079521	141079667	146
max	LRP1B	chr2	141208126	141208240	114
max	LRP1B	chr2	141459279	141459424	145
max	LRP1B	chr2	141299337	141299550	213
max	LRP1B	chr2	140995710	140995875	165
max	LRP1B	chr2	141201888	141202028	140
max	LRP1B	chr2	141812674	141812838	164
max	LRP1B	chr2	141264354	141264497	143
max	LRP1B	chr2	141110511	141110651	140
max	LRP1B	chr2	141202121	141202258	137
max	LRP1B	chr2	141113900	141114055	155
max	LRP1B	chr2	141625657	141625842	185
max	LRP1B	chr2	141747090	141747236	146
max	LRP1B	chr2	141625148	141625413	265
max	LRP1B	chr2	141777480	141777681	201
max	LRP1B	chr2	141214013	141214182	169
max	LRP1B	chr2	141356189	141356414	225
max	LRP1B	chr2	141200062	141200202	140
max	LRP1B	chr2	141598476	141598671	195
max	LRP1B	chr2	141707793	141707981	188
max	LRP1B	chr2	141272211	141272351	140
max	LRP1B	chr2	141232696	141232916	220
max	LRP1B	chr2	141298531	141298677	146
max	LRP1B	chr2	141143451	141143588	137
max	LRP1B	chr2	141245175	141245318	143
max	LRP1B	chr2	141457808	141458200	392
max	LRP1B	chr2	141739718	141739855	137
max	LRP1B	chr2	141242901	141243103	202
max	LRP1B	chr2	141274447	141274590	143
max	LRP1B	chr2	141709418	141709519	101
max	LRP1B	chr2	141283402	141283572	170
max	LRP1B	chr2	141135738	141135865	127
max	LRP1B	chr2	141294139	141294288	149
max	LRP1B	chr2	140992344	140992463	119
max	LRP1B	chr2	141773254	141773494	240
max	LRP1B	chr2	141680523	141680726	203
max	LRP1B	chr2	141283795	141283929	134
max	LRP1B	chr2	141291579	141291719	140
max	LRP1B	chr2	140990744	140990905	161
max	LRP1B	chr2	141260521	141260682	161
max	LRP1B	chr2	141130566	141130716	150
max	LRP1B	chr2	141250166	141250272	106
max	LRP1B	chr2	141259245	141259453	208
max	LRP1B	chr2	141253123	141253327	204
max	PCMTD1	chr8	52773394	52773721	327
max	PCMTD1	chr8	52732900	52733288	388
max	PCMTD1	chr8	52762609	52762656	47
max	PCMTD1	chr8	52739900	52739931	31
max	PCMTD1	chr8	52746067	52746259	192
max	PCMTD1	chr8	52743993	52744137	144
max	PCMTD1	chr8	52811479	52811681	202
max	PCMTD1	chr8	52758210	52758333	123
max	SLC10A1	chr14	70245888	70246087	199
max	SLC10A1	chr14	70242988	70243115	127
max	SLC10A1	chr14	70263506	70263882	376
max	SLC10A1	chr14	70252803	70253034	231
max	SLC10A1	chr14	70245039	70245256	217
max	TMEM170A	chr16	75485556	75485747	191
max	TMEM170A	chr16	75481445	75481596	151
max	TMEM170A	chr16	75498355	75498508	153
max	TMEM51	chr1	15545811	15546249	438
max	TMEM51	chr1	15541573	15541937	364
max	TTLL2	chr6	167738651	167738718	67
max	TTLL2	chr6	167752124	167752301	177
max	TTLL2	chr6	167753582	167755177	1595
max	TTLL2	chr6	167741481	167741607	126
p3	SPRR3	chr1	152975486	152976016	530
p3	ZNF814	chr19	58384179	58386604	2425
p3	ZNF814	chr19	58400124	58400180	56
p3	ZNF814	chr19	58388273	58388420	147
p3	CRELD2	chr22	50316249	50316365	116
p3	CRELD2	chr22	50313793	50313905	112
p3	CRELD2	chr22	50316871	50316975	104
p3	CRELD2	chr22	50312867	50312970	103
p3	CRELD2	chr22	50313367	50313498	131
p3	CRELD2	chr22	50320892	50320965	73
p3	CRELD2	chr22	50315934	50316101	167
p3	CRELD2	chr22	50319054	50319215	161
p3	CRELD2	chr22	50315222	50315419	197
p3	CRELD2	chr22	50312407	50312556	149
p3	CRELD2	chr22	50317997	50318113	116
p3	DSPP	chr4	88533246	88533350	104
p3	DSPP	chr4	88532050	88532121	71
p3	DSPP	chr4	88534926	88537730	2804
p3	DSPP	chr4	88533463	88534482	1019
p3	MUC7	chr4	71339728	71339802	74
p3	MUC7	chr4	71346505	71347605	1100
p3	ODF1	chr8	103563945	103564285	340
p3	ODF1	chr8	103572669	103573122	453
p3	ZNF880	chr19	52876353	52876500	147
p3	ZNF880	chr19	52877726	52877808	82
p3	ZNF880	chr19	52887091	52888577	1486
p3	ZNF880	chr19	52882663	52882793	130
p3	ZNF880	chr19	52873208	52873240	32
p3	ZNF880	chr19	52877541	52877690	149
p4	ACTR3C	chr7	149986528	149986692	164
p4	ACTR3C	chr7	149992330	149992395	65
p4	ACTR3C	chr7	149990390	149990518	128
p4	ACTR3C	chr7	149983445	149983639	194
p4	ACTR3C	chr7	149981831	149981944	113
p4	ACTR3C	chr7	149946064	149946153	89
p4	ADAMTS7	chr15	79066498	79066652	154
p4	ADAMTS7	chr15	79057976	79059403	1427
p4	ADAMTS7	chr15	79056257	79056451	194
p4	ADAMTS7	chr15	79054734	79054917	183
p4	ADAMTS7	chr15	79056886	79057059	173
p4	ADAMTS7	chr15	79103452	79103572	120
p4	ADAMTS7	chr15	79065414	79065555	141
p4	ADAMTS7	chr15	79083001	79083146	145
p4	ADAMTS7	chr15	79056030	79056197	167
p4	ADAMTS7	chr15	79066955	79067145	190
p4	ADAMTS7	chr15	79063916	79064181	265
p4	ADAMTS7	chr15	79092523	79092899	376
p4	ADAMTS7	chr15	79069775	79069940	165
p4	ADAMTS7	chr15	79082020	79082190	170
p4	ADAMTS7	chr15	79083471	79083575	104
p4	ADAMTS7	chr15	79051752	79051930	178
p4	ADAMTS7	chr15	79068519	79068685	166
p4	ADAMTS7	chr15	79090279	79090465	186
p4	ADAMTS7	chr15	79069080	79069193	113
p4	ADAMTS7	chr15	79060464	79060611	147
p4	ADAMTS7	chr15	79059710	79059944	234
p4	ADAMTS7	chr15	79080562	79080726	164
p4	ADAMTS7	chr15	79063493	79063655	162
p4	ADAMTS7	chr15	79088921	79089138	217
p4	AKR1C1	chr10	5014765	5014951	186
p4	AKR1C1	chr10	5011856	5011918	62
p4	AKR1C1	chr10	5014382	5014512	130
p4	AKR1C1	chr10	5009108	5009245	137
p4	AKR1C1	chr10	5010490	5010588	98
p4	AKR1C1	chr10	5011003	5011146	143
p4	AKR1C1	chr10	5008095	5008283	188
p4	AKR1C1	chr10	5005626	5005730	104
p4	AKR1C1	chr10	5019881	5019944	63
p4	AKR1C1	chr10	5005985	5006095	110
p4	AKR1C1	chr10	5018032	5018135	103
p4	ANK1	chr8	41554183	41554301	118
p4	ANK1	chr8	41552099	41552331	232
p4	ANK1	chr8	41547734	41547874	140
p4	ANK1	chr8	41553870	41554115	245
p4	ANK1	chr8	41573159	41573377	218
p4	ANK1	chr8	41552684	41552859	175
p4	ANK1	chr8	41575111	41575230	119
p4	ANK1	chr8	41561881	41562000	119
p4	ANK1	chr8	41556959	41557076	117
p4	ANK1	chr8	41545663	41545758	95
p4	ANK1	chr8	41546018	41546117	99
p4	ANK1	chr8	41551405	41551630	225
p4	ANK1	chr8	41561548	41561667	119
p4	ANK1	chr8	41572483	41572602	119
p4	ANK1	chr8	41529861	41530440	579
p4	ANK1	chr8	41574460	41574579	119
p4	ANK1	chr8	41519308	41519469	161
p4	ANK1	chr8	41518973	41519092	119
p4	ANK1	chr8	41563650	41563769	119
p4	ANK1	chr8	41543659	41543811	152
p4	ANK1	chr8	41557938	41557982	44
p4	ANK1	chr8	41583268	41583474	206
p4	ANK1	chr8	41542051	41542218	167
p4	ANK1	chr8	41541980	41542020	40
p4	ANK1	chr8	41550612	41550729	117
p4	ANK1	chr8	41547981	41548127	146
p4	ANK1	chr8	41521166	41521270	104
p4	ANK1	chr8	41575613	41575732	119
p4	ANK1	chr8	41525774	41526092	318
p4	ANK1	chr8	41522312	41522551	239
p4	ANK1	chr8	41580632	41580751	119
p4	ANK1	chr8	41591478	41591597	119
p4	ANK1	chr8	41566285	41566503	218
p4	ANK1	chr8	41555550	41555649	99
p4	ANK1	chr8	41585415	41585534	119
p4	ANK1	chr8	41577168	41577386	218
p4	ANK1	chr8	41753862	41754008	146
p4	ANK1	chr8	41550155	41550404	249
p4	ANK1	chr8	41655019	41655066	47
p4	ANK1	chr8	41513235	41513282	47
p4	ANK1	chr8	41571663	41571782	119
p4	ANK1	chr8	41581963	41582082	119
p4	ANK1	chr8	41581042	41581161	119
p4	ANK1	chr8	41615543	41615665	122
p4	ANK1	chr8	41559559	41559672	113
p4	ANK1	chr8	41584757	41584876	119
p4	ANK1	chr8	41559057	41559150	93
p4	BMS1	chr10	43293905	43294083	178
p4	BMS1	chr10	43315945	43316146	201
p4	BMS1	chr10	43316371	43316450	79
p4	BMS1	chr10	43291911	43292689	778
p4	BMS1	chr10	43317499	43317642	143
p4	BMS1	chr10	43319046	43319242	196
p4	BMS1	chr10	43325698	43325880	182
p4	BMS1	chr10	43279832	43280028	196
p4	BMS1	chr10	43312755	43312952	197
p4	BMS1	chr10	43288394	43288602	208
p4	BMS1	chr10	43326303	43326554	251
p4	BMS1	chr10	43287930	43288072	142
p4	BMS1	chr10	43315673	43315882	209
p4	BMS1	chr10	43297574	43297676	102
p4	BMS1	chr10	43280919	43281130	211
p4	BMS1	chr10	43282605	43282705	100
p4	BMS1	chr10	43292859	43292981	122
p4	BMS1	chr10	43318555	43318723	168
p4	BMS1	chr10	43287064	43287227	163
p4	BMS1	chr10	43285760	43285969	209
p4	BMS1	chr10	43289289	43289449	160
p4	BMS1	chr10	43312036	43312130	94
p4	BPTF	chr17	65906982	65909313	2331
p4	BPTF	chr17	65899894	65900044	150
p4	BPTF	chr17	65887949	65888160	211
p4	BPTF	chr17	65925441	65925613	172
p4	BPTF	chr17	65916120	65916269	149
p4	BPTF	chr17	65905687	65905887	200
p4	BPTF	chr17	65900807	65900966	159
p4	BPTF	chr17	65928016	65928145	129
p4	BPTF	chr17	65882233	65882442	209
p4	BPTF	chr17	65889475	65889851	376
p4	BPTF	chr17	65924460	65924727	267
p4	BPTF	chr17	65821636	65821690	54
p4	BPTF	chr17	65850045	65850888	843
p4	BPTF	chr17	65941514	65942451	937
p4	BPTF	chr17	65936544	65936782	238
p4	BPTF	chr17	65943831	65943934	103
p4	BPTF	chr17	65955646	65956001	355
p4	BPTF	chr17	65871661	65871870	209
p4	BPTF	chr17	65920652	65920715	63
p4	BPTF	chr17	65862569	65862813	244
p4	BPTF	chr17	65870922	65871146	224
p4	BPTF	chr17	65821830	65822463	633
p4	BPTF	chr17	65918945	65919116	171
p4	BPTF	chr17	65890139	65890291	152
p4	BPTF	chr17	65960317	65960530	213
p4	BPTF	chr17	65944186	65944432	246
p4	BPTF	chr17	65978357	65978414	57
p4	BPTF	chr17	65971877	65972084	207
p4	BPTF	chr17	65914819	65914964	145
p4	BPTF	chr17	65962677	65962782	105
p4	BPTF	chr17	65940255	65940498	243
p4	BPTF	chr17	65959438	65959632	194
p4	CDK5RAP3	chr17	46051755	46051824	69
p4	CDK5RAP3	chr17	46047998	46048099	101
p4	CDK5RAP3	chr17	46053224	46053389	165
p4	CDK5RAP3	chr17	46058942	46059110	168
p4	CDK5RAP3	chr17	46048717	46048783	66
p4	CDK5RAP3	chr17	46048502	46048528	26
p4	CDK5RAP3	chr17	46054067	46054198	131
p4	CDK5RAP3	chr17	46056184	46056293	109
p4	CDK5RAP3	chr17	46058518	46058710	192
p4	CDK5RAP3	chr17	46052869	46053029	160
p4	CDK5RAP3	chr17	46051286	46051407	121
p4	CDK5RAP3	chr17	46050874	46051026	152
p4	CDK5RAP3	chr17	46055187	46055286	99
p4	CDK5RAP3	chr17	46057948	46058174	226
p4	CDK5RAP3	chr17	46058792	46058878	86
p4	CDK5RAP3	chr17	46052441	46052713	272
p4	CHIT1	chr1	203187152	203187229	77
p4	CHIT1	chr1	203188333	203188467	134
p4	CHIT1	chr1	203192252	203192397	145
p4	CHIT1	chr1	203194165	203194242	77
p4	CHIT1	chr1	203186482	203186510	28
p4	CHIT1	chr1	203192612	203192798	186
p4	CHIT1	chr1	203198729	203198804	75
p4	CHIT1	chr1	203191319	203191463	144
p4	CHIT1	chr1	203188781	203188987	206
p4	CHIT1	chr1	203194786	203195008	222
p4	CHIT1	chr1	203186856	203187003	147
p4	CHIT1	chr1	203197650	203197700	50
p4	CHIT1	chr1	203186006	203186271	265
p4	DPRX	chr19	54135350	54135398	48
p4	DPRX	chr19	54139839	54140252	413
p4	DPRX	chr19	54137774	54137949	175
p4	DRD5	chr4	9783643	9785097	1454
p4	DYNC2H1	chr11	103112245	103112286	41
p4	DYNC2H1	chr11	103104752	103104899	147
p4	DYNC2H1	chr11	103126133	103126273	140
p4	DYNC2H1	chr11	103106390	103106552	162
p4	DYNC2H1	chr11	103006213	103006373	160
p4	DYNC2H1	chr11	103006438	103006687	249
p4	DYNC2H1	chr11	103175313	103175459	146
p4	DYNC2H1	chr11	103107148	103107278	130
p4	DYNC2H1	chr11	102993543	102993739	196
p4	DYNC2H1	chr11	103091341	103091522	181
p4	DYNC2H1	chr11	103101978	103102085	107
p4	DYNC2H1	chr11	103093683	103093825	142
p4	DYNC2H1	chr11	102999628	102999744	116
p4	DYNC2H1	chr11	103325903	103326033	130
p4	DYNC2H1	chr11	102991165	102991320	155
p4	DYNC2H1	chr11	103026049	103026240	191
p4	DYNC2H1	chr11	103018490	103018626	136
p4	DYNC2H1	chr11	103027106	103027509	403
p4	DYNC2H1	chr11	103114411	103114530	119
p4	DYNC2H1	chr11	103115969	103116113	144
p4	DYNC2H1	chr11	103082507	103082682	175
p4	DYNC2H1	chr11	103080594	103080699	105
p4	DYNC2H1	chr11	103086439	103086597	158
p4	DYNC2H1	chr11	103092748	103092892	144
p4	DYNC2H1	chr11	103005039	103005158	119
p4	DYNC2H1	chr11	102980293	102980508	215
p4	DYNC2H1	chr11	103173811	103173992	181
p4	DYNC2H1	chr11	103156973	103157125	152
p4	DYNC2H1	chr11	103158251	103158344	93
p4	DYNC2H1	chr11	103013986	103014134	148
p4	DYNC2H1	chr11	103182596	103182772	176
p4	DYNC2H1	chr11	103187263	103187359	96
p4	DYNC2H1	chr11	103019208	103019356	148
p4	DYNC2H1	chr11	103124003	103124187	184
p4	DYNC2H1	chr11	103024021	103024247	226
p4	DYNC2H1	chr11	102987288	102987453	165
p4	DYNC2H1	chr11	103090633	103090767	134
p4	DYNC2H1	chr11	103004273	103004446	173
p4	DYNC2H1	chr11	102984255	102984446	191
p4	DYNC2H1	chr11	103339306	103339443	137
p4	DYNC2H1	chr11	102991643	102991775	132
p4	DYNC2H1	chr11	103036616	103036787	171
p4	DYNC2H1	chr11	103178439	103178570	131
p4	DYNC2H1	chr11	103040826	103041029	203
p4	DYNC2H1	chr11	103025169	103025345	176
p4	DYNC2H1	chr11	103029395	103029548	153
p4	DYNC2H1	chr11	103022854	103023024	170
p4	DYNC2H1	chr11	103151066	103151152	86
p4	DYNC2H1	chr11	103306660	103306770	110
p4	DYNC2H1	chr11	102995818	102996034	216
p4	DYNC2H1	chr11	102985895	102986034	139
p4	DYNC2H1	chr11	102991407	102991541	134
p4	DYNC2H1	chr11	103130606	103130716	110
p4	DYNC2H1	chr11	103153726	103153824	98
p4	DYNC2H1	chr11	103068651	103068802	151
p4	DYNC2H1	chr11	103039473	103039699	226
p4	DYNC2H1	chr11	103344808	103344840	32
p4	DYNC2H1	chr11	102992090	102992235	145
p4	DYNC2H1	chr11	103046953	103047173	220
p4	DYNC2H1	chr11	103048274	103048559	285
p4	DYNC2H1	chr11	103033746	103033886	140
p4	DYNC2H1	chr11	103031650	103031783	133
p4	DYNC2H1	chr11	102984821	102984977	156
p4	DYNC2H1	chr11	103025413	103025548	135
p4	DYNC2H1	chr11	103044773	103044909	136
p4	DYNC2H1	chr11	103049744	103049972	228
p4	DYNC2H1	chr11	103062815	103063003	188
p4	DYNC2H1	chr11	103060390	103060555	165
p4	DYNC2H1	chr11	102988349	102988602	253
p4	DYNC2H1	chr11	103074381	103074515	134
p4	DYNC2H1	chr11	103128326	103128490	164
p4	DYNC2H1	chr11	103043800	103044044	244
p4	DYNC2H1	chr11	103062235	103062358	123
p4	DYNC2H1	chr11	103058058	103058325	267
p4	DYNC2H1	chr11	103069946	103070215	269
p4	DYNC2H1	chr11	103326992	103327094	102
p4	DYNC2H1	chr11	103349812	103349991	179
p4	DYNC2H1	chr11	103041604	103041807	203
p4	DYNC2H1	chr11	103152897	103152968	71
p4	DYNC2H1	chr11	103270380	103270610	230
p4	DYNC2H1	chr11	103228960	103229097	137
p4	DYNC2H1	chr11	103075540	103075703	163
p4	DYNC2H1	chr11	103056960	103057240	280
p4	DYNC2H1	chr11	103194603	103194728	125
p4	DYNC2H1	chr11	103055614	103055790	176
p4	DYNC2H1	chr11	103029628	103029766	138
p4	DYNC2H1	chr11	103070764	103070893	129
p4	DYNC2H1	chr11	103126824	103126979	155
p4	DYNC2H1	chr11	103059215	103059387	172
p4	DYNC2H1	chr11	103052475	103052625	150
p4	DYNC2H1	chr11	103191747	103191976	229
p4	F5	chr1	169489747	169489912	165
p4	F5	chr1	169492424	169492600	176
p4	F5	chr1	169525873	169526115	242
p4	F5	chr1	169521784	169521982	198
p4	F5	chr1	169484671	169484874	203
p4	F5	chr1	169505733	169505928	195
p4	F5	chr1	169483540	169483707	167
p4	F5	chr1	169541448	169541591	143
p4	F5	chr1	169524409	169524595	186
p4	F5	chr1	169515669	169515840	171
p4	F5	chr1	169487639	169487811	172
p4	F5	chr1	169493028	169493152	124
p4	F5	chr1	169494064	169494156	92
p4	F5	chr1	169528380	169528544	164
p4	F5	chr1	169519867	169519987	120
p4	F5	chr1	169513523	169513771	248
p4	F5	chr1	169519028	169519263	235
p4	F5	chr1	169497142	169497342	200
p4	F5	chr1	169555456	169555634	178
p4	F5	chr1	169495128	169495265	137
p4	F5	chr1	169529781	169530014	233
p4	F5	chr1	169509521	169512362	2841
p4	F5	chr1	169500013	169500270	257
p4	F5	chr1	169498835	169499066	231
p4	F5	chr1	169551658	169551770	112
p4	FAM171B	chr2	187626195	187627560	1365
p4	FAM171B	chr2	187611808	187611987	179
p4	FAM171B	chr2	187604944	187605198	254
p4	FAM171B	chr2	187625829	187625973	144
p4	FAM171B	chr2	187608199	187608312	113
p4	FAM171B	chr2	187618649	187618786	137
p4	FAM171B	chr2	187615850	187616041	191
p4	FAM171B	chr2	187558890	187559148	258
p4	FAM194B	chr13	46148966	46149075	109
p4	FAM194B	chr13	46135493	46135671	178
p4	FAM194B	chr13	46164773	46164842	69
p4	FAM194B	chr13	46154057	46154119	62
p4	FAM194B	chr13	46161187	46161377	190
p4	FAM194B	chr13	46154727	46154810	83
p4	FAM194B	chr13	46137851	46137933	82
p4	FAM194B	chr13	46142439	46142596	157
p4	FAM194B	chr13	46118884	46119130	246
p4	FAM194B	chr13	46115586	46115825	239
p4	FAM194B	chr13	46170493	46171150	657
p4	FAM194B	chr13	46124017	46124190	173
p4	FAM194B	chr13	46124355	46124461	106
p4	FLG2	chr1	152323075	152330133	7058
p4	FLG2	chr1	152331212	152331370	158
p4	FZD2	chr17	42634818	42636764	1946
p4	GPRIN2	chr10	46998870	47000267	1397
p4	GRM8	chr7	126079162	126079232	70
p4	GRM8	chr7	126172995	126173951	956
p4	GRM8	chr7	126544015	126544190	175
p4	GRM8	chr7	126882738	126883268	530
p4	GRM8	chr7	126716161	126716300	139
p4	GRM8	chr7	126746539	126746776	237
p4	GRM8	chr7	126341800	126341891	91
p4	GRM8	chr7	126086119	126086436	317
p4	GRM8	chr7	126409908	126410129	221
p4	GRM8	chr7	126542585	126542743	158
p4	GRM8	chr7	126249405	126249562	157
p4	GRM8	chr7	126544591	126544747	156
p4	HCLS1	chr3	121363654	121363785	131
p4	HCLS1	chr3	121354571	121354661	90
p4	HCLS1	chr3	121350682	121350839	157
p4	HCLS1	chr3	121353043	121353275	232
p4	HCLS1	chr3	121351168	121351420	252
p4	HCLS1	chr3	121350937	121351041	104
p4	HCLS1	chr3	121361763	121361838	75
p4	HCLS1	chr3	121355270	121355346	76
p4	HCLS1	chr3	121351903	121352028	125
p4	HCLS1	chr3	121376115	121376209	94
p4	HCLS1	chr3	121366155	121366339	184
p4	HCLS1	chr3	121377100	121377204	104
p4	HCLS1	chr3	121355982	121356113	131
p4	KRT2	chr12	53038792	53039228	436
p4	KRT2	chr12	53043687	53043768	81
p4	KRT2	chr12	53045331	53045936	605
p4	KRT2	chr12	53039308	53039363	55
p4	KRT2	chr12	53041503	53041649	146
p4	KRT2	chr12	53042780	53042896	116
p4	KRT2	chr12	53040513	53040754	241
p4	KRT2	chr12	53044112	53044347	235
p4	KRT2	chr12	53041946	53042131	185
p4	KRTAP4-11	chr17	39273969	39274577	608
p4	KRTAP4-8	chr17	39253768	39254346	578
p4	KRTAP5-8	chr11	71249091	71249675	584
p4	LDLRAD1	chr1	54477805	54477963	158
p4	LDLRAD1	chr1	54483754	54483859	105
p4	LDLRAD1	chr1	54479898	54480047	149
p4	LDLRAD1	chr1	54475944	54476093	149
p4	LDLRAD1	chr1	54483038	54483110	72
p4	LDLRAD1	chr1	54474644	54474813	169
p4	MAML2	chr11	95712101	95713137	1036
p4	MAML2	chr11	95825045	95826691	1646
p4	MAML2	chr11	96074536	96075069	533
p4	MAML2	chr11	95718684	95718816	132
p4	MAML2	chr11	95724673	95724897	224
p4	MUC17	chr7	100696256	100696438	182
p4	MUC17	chr7	100674390	100674512	122
p4	MUC17	chr7	100701273	100701335	62
p4	MUC17	chr7	100695073	100695253	180
p4	MUC17	chr7	100663406	100663508	102
p4	MUC17	chr7	100693754	100693926	172
p4	MUC17	chr7	100692594	100692673	79
p4	MUC17	chr7	100692115	100692263	148
p4	MUC17	chr7	100699464	100699561	97
p4	MUC17	chr7	100694883	100694972	89
p4	MUC17	chr7	100691254	100691406	152
p4	MUC17	chr7	100696609	100696727	118
p4	MUC17	chr7	100674871	100687110	12239
p4	NBPF9	chr1	148270978	148271171	193
p4	NBPF9	chr1	145315780	145315909	129
p4	NBPF9	chr1	148270207	148270279	72
p4	NBPF9	chr1	148335524	148335750	226
p4	NBPF9	chr1	144823802	144823995	193
p4	NBPF9	chr1	144823117	144823189	72
p4	NBPF9	chr1	144816462	144816688	226
p4	NBPF9	chr1	144619336	144619429	93
p4	NBPF9	chr1	148334184	148334256	72
p4	NBPF9	chr1	148341784	148342016	232
p4	NBPF9	chr1	144821910	144822094	184
p4	NBPF9	chr1	144824694	144824766	72
p4	NBPF9	chr1	148346571	148346766	195
p4	NBPF9	chr1	145314893	145315086	193
p4	NBPF9	chr1	145313323	145313516	193
p4	NBPF9	chr1	148342459	148342552	93
p4	NBPF9	chr1	144618071	144618306	235
p4	NBPF9	chr1	144817955	144818027	72
p4	NBPF9	chr1	148344629	148344752	123
p4	NBPF9	chr1	144827809	144827938	129
p4	NBPF9	chr1	148343583	148343818	235
p4	NBPF9	chr1	144815925	144816018	93
p4	NBPF9	chr1	148340227	148340457	230
p4	NBPF9	chr1	148338356	148338479	123
p4	NBPF9	chr1	144826224	144826296	72
p4	NBPF9	chr1	148269426	148269619	193
p4	NBPF9	chr1	148330113	148330297	184
p4	NBPF9	chr1	148329019	148329091	72
p4	NBPF9	chr1	148259894	148260087	193
p4	NBPF9	chr1	148258306	148258499	193
p4	NBPF9	chr1	148251864	148252128	264
p4	NBPF9	chr1	148259133	148259205	72
p4	NBPF9	chr1	144811733	144811967	234
p4	NBPF9	chr1	144826922	144827115	193
p4	NBPF9	chr1	144814669	144814904	235
p4	NBPF9	chr1	144813731	144813854	123
p4	NBPF9	chr1	144828530	144828794	264
p4	NBPF9	chr1	144619872	144620104	232
p4	NBPF9	chr1	148268665	148268737	72
p4	NBPF9	chr1	145314205	145314277	72
p4	NBPF9	chr1	148337307	148337542	235
p4	NBPF9	chr1	144621436	144621666	230
p4	NBPF9	chr1	148257483	148257612	129
p4	NBPF9	chr1	145368430	145368694	264
p4	NBPF9	chr1	148267007	148267136	129
p4	NBPF9	chr1	144825772	144825798	26
p4	NBPF9	chr1	144617139	144617262	123
p4	NBPF9	chr1	144825342	144825535	193
p4	NBPF9	chr1	148336194	148336287	93
p4	NBPF9	chr1	144615120	144615313	193
p4	NBPF9	chr1	148267830	148268023	193
p4	NEIL1	chr15	75644441	75644581	140
p4	NEIL1	chr15	75644654	75644738	84
p4	NEIL1	chr15	75641214	75641690	476
p4	NEIL1	chr15	75640121	75640377	256
p4	NEIL1	chr15	75644932	75645052	120
p4	NEIL1	chr15	75646069	75646217	148
p4	NEIL1	chr15	75646580	75646628	48
p4	NEIL1	chr15	75646983	75647169	186
p4	NEIL1	chr15	75646761	75646843	82
p4	NEIL1	chr15	75647294	75647385	91
p4	NR1H2	chr19	50883026	50883146	120
p4	NR1H2	chr19	50885212	50885441	229
p4	NR1H2	chr19	50885702	50885869	167
p4	NR1H2	chr19	50882248	50882448	200
p4	NR1H2	chr19	50881768	50882063	295
p4	NR1H2	chr19	50880979	50881137	158
p4	NR1H2	chr19	50881395	50881706	311
p4	NR1H2	chr19	50880852	50880915	63
p4	OR2T4	chr1	248524872	248525939	1067
p4	OVGP1	chr1	111965538	111965683	145
p4	OVGP1	chr1	111962221	111962358	137
p4	OVGP1	chr1	111958934	111959090	156
p4	OVGP1	chr1	111964176	111964305	129
p4	OVGP1	chr1	111969673	111969723	50
p4	OVGP1	chr1	111970308	111970353	45
p4	OVGP1	chr1	111957075	111957976	901
p4	OVGP1	chr1	111969048	111969454	406
p4	OVGP1	chr1	111963887	111964093	206
p4	OVGP1	chr1	111967994	111968137	143
p4	OVGP1	chr1	111966154	111966340	186
p4	POU2F2	chr19	42603857	42603983	126
p4	POU2F2	chr19	42621391	42621528	137
p4	POU2F2	chr19	42599686	42599855	169
p4	POU2F2	chr19	42603668	42603780	112
p4	POU2F2	chr19	42599427	42599624	197
p4	POU2F2	chr19	42599929	42600091	162
p4	POU2F2	chr19	42596008	42596102	94
p4	POU2F2	chr19	42626485	42626540	55
p4	POU2F2	chr19	42596206	42596432	226
p4	POU2F2	chr19	42626652	42626738	86
p4	POU2F2	chr19	42595398	42595753	355
p4	POU2F2	chr19	42626267	42626344	77
p4	POU2F2	chr19	42600223	42600405	182
p4	POU2F2	chr19	42597970	42598057	87
p4	POU2F2	chr19	42636525	42636573	48
p4	PRKDC	chr8	48733269	48733514	245
p4	PRKDC	chr8	48761704	48761874	170
p4	PRKDC	chr8	48731952	48732081	129
p4	PRKDC	chr8	48736408	48736567	159
p4	PRKDC	chr8	48713343	48713557	214
p4	PRKDC	chr8	48743155	48743307	152
p4	PRKDC	chr8	48730000	48730132	132
p4	PRKDC	chr8	48715856	48716051	195
p4	PRKDC	chr8	48769706	48769870	164
p4	PRKDC	chr8	48767772	48767944	172
p4	PRKDC	chr8	48751698	48751817	119
p4	PRKDC	chr8	48761929	48762074	145
p4	PRKDC	chr8	48706840	48707072	232
p4	PRKDC	chr8	48774612	48774698	86
p4	PRKDC	chr8	48801068	48801221	153
p4	PRKDC	chr8	48841641	48841748	107
p4	PRKDC	chr8	48749762	48749990	228
p4	PRKDC	chr8	48744364	48744497	133
p4	PRKDC	chr8	48842402	48842582	180
p4	PRKDC	chr8	48739206	48739432	226
p4	PRKDC	chr8	48734154	48734363	209
p4	PRKDC	chr8	48719687	48719897	210
p4	PRKDC	chr8	48711760	48711961	201
p4	PRKDC	chr8	48856402	48856453	51
p4	PRKDC	chr8	48811019	48811139	120
p4	PRKDC	chr8	48852100	48852267	167
p4	PRKDC	chr8	48773449	48773542	93
p4	PRKDC	chr8	48689394	48689554	160
p4	PRKDC	chr8	48740718	48740918	200
p4	PRKDC	chr8	48830826	48830953	127
p4	PRKDC	chr8	48752566	48752760	194
p4	PRKDC	chr8	48765223	48765355	132
p4	PRKDC	chr8	48840320	48840460	140
p4	PRKDC	chr8	48766633	48766785	152
p4	PRKDC	chr8	48824959	48825132	173
p4	PRKDC	chr8	48710787	48710968	181
p4	PRKDC	chr8	48701701	48701809	108
p4	PRKDC	chr8	48809710	48809864	154
p4	PRKDC	chr8	48805689	48805957	268
p4	PRKDC	chr8	48802807	48803051	244
p4	PRKDC	chr8	48868423	48868518	95
p4	PRKDC	chr8	48843221	48843357	136
p4	PRKDC	chr8	48827877	48827988	111
p4	PRKDC	chr8	48746746	48746967	221
p4	PRKDC	chr8	48748888	48749098	210
p4	PRKDC	chr8	48772161	48772330	169
p4	PRKDC	chr8	48817418	48817546	128
p4	PRKDC	chr8	48815118	48815365	247
p4	PRKDC	chr8	48697663	48697888	225
p4	PRKDC	chr8	48694712	48694825	113
p4	PRKDC	chr8	48855758	48855936	178
p4	PRKDC	chr8	48800097	48800276	179
p4	PRKDC	chr8	48848902	48849087	185
p4	PRKDC	chr8	48866887	48867016	129
p4	PRKDC	chr8	48685764	48685821	57
p4	PRKDC	chr8	48826450	48826634	184
p4	PRKDC	chr8	48691009	48691231	222
p4	PRKDC	chr8	48839743	48839923	180
p4	PRKDC	chr8	48771399	48771557	158
p4	PRKDC	chr8	48848281	48848470	189
p4	PRKDC	chr8	48812922	48813037	115
p4	PRKDC	chr8	48694928	48695169	241
p4	PRKDC	chr8	48691554	48691664	110
p4	PRKDC	chr8	48696292	48696380	88
p4	PRKDC	chr8	48691278	48691370	92
p4	PRKDC	chr8	48686723	48686948	225
p4	PRKDC	chr8	48801564	48801793	229
p4	PRKDC	chr8	48866169	48866289	120
p4	PRKDC	chr8	48690236	48690445	209
p4	PRKDC	chr8	48845569	48845742	173
p4	PRKDC	chr8	48777106	48777334	228
p4	PRKDC	chr8	48775949	48776148	199
p4	PRKDC	chr8	48771066	48771206	140
p4	PRKDC	chr8	48869720	48869833	113
p4	PRKDC	chr8	48846514	48846660	146
p4	PRKDC	chr8	48793966	48794091	125
p4	PRKDC	chr8	48798494	48798718	224
p4	PRKDC	chr8	48790274	48790422	148
p4	PRKDC	chr8	48866356	48866489	133
p4	PRKDC	chr8	48774923	48775112	189
p4	PRKDC	chr8	48856523	48856599	76
p4	PRKDC	chr8	48794462	48794668	206
p4	PRKDC	chr8	48847558	48847628	70
p4	PRKDC	chr8	48701456	48701620	164
p4	PRKDC	chr8	48869904	48870001	97
p4	PRKDC	chr8	48872522	48872696	174
p4	PRKDC	chr8	48792041	48792229	188
p4	RBM23	chr14	23370928	23370952	24
p4	RBM23	chr14	23380526	23380612	86
p4	RBM23	chr14	23373359	23373409	50
p4	RBM23	chr14	23377531	23377599	68
p4	RBM23	chr14	23371012	23371102	90
p4	RBM23	chr14	23371178	23371318	140
p4	RBM23	chr14	23378681	23378814	133
p4	RBM23	chr14	23374534	23374672	138
p4	RBM23	chr14	23374292	23374465	173
p4	RBM23	chr14	23373459	23373545	86
p4	RBM23	chr14	23375393	23375587	194
p4	RBM23	chr14	23374804	23374878	74
p4	RBM23	chr14	23371385	23371601	216
p4	RBM23	chr14	23374073	23374231	158
p4	RHPN2	chr19	33493708	33493916	208
p4	RHPN2	chr19	33490481	33490621	140
p4	RHPN2	chr19	33503542	33503640	98
p4	RHPN2	chr19	33493142	33493319	177
p4	RHPN2	chr19	33512466	33512562	96
p4	RHPN2	chr19	33498909	33499096	187
p4	RHPN2	chr19	33486921	33487136	215
p4	RHPN2	chr19	33535144	33535280	136
p4	RHPN2	chr19	33502574	33502719	145
p4	RHPN2	chr19	33555679	33555768	89
p4	RHPN2	chr19	33470891	33471172	281
p4	RHPN2	chr19	33517399	33517548	149
p4	RHPN2	chr19	33484872	33484969	97
p4	RHPN2	chr19	33482718	33482885	167
p4	RHPN2	chr19	33481409	33481585	176
p4	SCFD2	chr4	54218754	54218943	189
p4	SCFD2	chr4	54179792	54179940	148
p4	SCFD2	chr4	54139982	54140178	196
p4	SCFD2	chr4	53740125	53740238	113
p4	SCFD2	chr4	53773613	53773768	155
p4	SCFD2	chr4	53786881	53787047	166
p4	SCFD2	chr4	53751903	53752043	140
p4	SCFD2	chr4	54231260	54232118	858
p4	SCFD2	chr4	54011489	54011759	270
p4	SLC35G5	chr8	11188605	11189642	1037
p4	SLC35G6	chr17	7385296	7386330	1034
p4	SLC35G6	chr17	7384825	7384848	23
p4	SLC39A5	chr12	56631361	56631525	164
p4	SLC39A5	chr12	56625048	56625355	307
p4	SLC39A5	chr12	56630923	56631152	229
p4	SLC39A5	chr12	56628930	56629120	190
p4	SLC39A5	chr12	56628597	56628780	183
p4	SLC39A5	chr12	56626462	56626666	204
p4	SLC39A5	chr12	56630169	56630286	117
p4	SLC39A5	chr12	56630704	56630805	101
p4	SLC39A5	chr12	56630355	56630540	185
p4	SLC39A5	chr12	56629333	56629494	161
p4	SON	chr21	34947891	34947983	92
p4	SON	chr21	34929451	34929632	181
p4	SON	chr21	34945603	34945771	168
p4	SON	chr21	34921771	34927707	5936
p4	SON	chr21	34931525	34931692	167
p4	SON	chr21	34944846	34944946	100
p4	SON	chr21	34929841	34929867	26
p4	SON	chr21	34915388	34915485	97
p4	SON	chr21	34941871	34941945	74
p4	SON	chr21	34948073	34948209	136
p4	SON	chr21	34941266	34941403	137
p4	SON	chr21	34918508	34918695	187
p4	SON	chr21	34931882	34932091	209
p4	SON	chr21	34939452	34939664	212
p4	SON	chr21	34948660	34948892	232
p4	SON	chr21	34932172	34932447	275
p4	SPATA20	chr17	48625393	48625459	66
p4	SPATA20	chr17	48627558	48627683	125
p4	SPATA20	chr17	48629319	48629551	232
p4	SPATA20	chr17	48625015	48625217	202
p4	SPATA20	chr17	48632582	48632683	101
p4	SPATA20	chr17	48627335	48627486	151
p4	SPATA20	chr17	48626636	48626858	222
p4	SPATA20	chr17	48624559	48624656	97
p4	SPATA20	chr17	48631601	48631821	220
p4	SPATA20	chr17	48632842	48633033	191
p4	SPATA20	chr17	48628348	48628561	213
p4	SPATA20	chr17	48625904	48625989	85
p4	SPATA20	chr17	48628861	48629050	189
p4	SPATA20	chr17	48627886	48627981	95
[truncated: 4,862 more rows]
